# Supplementary material for: New Metabolites from the Marine Sponge Scopalina hapalia Collected in Mayotte Lagoon
Source: MDPI journal article supplement (doi:10.3390/md20030186), 2022-03-02
Supplement: s1 [file s1]

## Article

# New metabolites from the marine sponge *Scopalina hapalia* collected in Mayotte lagoon

Charifat Saïd Hassane <sup>1</sup>, Gaëtan Herbette <sup>2</sup>, Elnur Garayev <sup>3</sup>, Fathi Mabrouki <sup>3</sup>, Patricia Clerc <sup>1</sup>, Nicole J. de Voogd <sup>4,5</sup>, Stephane Greff <sup>3</sup>, Ioannis P. Trougakos <sup>6</sup>, Jamal Ouazzani <sup>7</sup>, Mireille Fouillaud <sup>1</sup>, Laurent Dufossé <sup>1</sup>, Béatrice Baghdikian <sup>3</sup>, Evelyne Ollivier <sup>3</sup>, Anne Gauvin-Bialecki <sup>1,\*</sup>

<sup>1</sup> Laboratoire de Chimie et de Biotechnologie des Produits Naturels, Faculté des Sciences et Technologies, Université de La Réunion, 15 Avenue René Cassin, CS 92003, 97744 Saint-Denis Cedex 9, La Réunion, France.

<sup>2</sup> Aix Marseille Université, CNRS, Centrale Marseille, FSCM, Spectropole, Campus de St Jérôme-Service 511, 13397 Marseille, France

<sup>3</sup> Aix Marseille Univ, Avignon Université, CNRS 7263, IRD 237, IMBE, Marseille, France

<sup>4</sup> Naturalis Biodiversity Center, Darwinweg 2, 2333 CR Leiden, The Netherlands

<sup>5</sup> Institute of Environmental Sciences, Leiden University, Einsteinweg 2, 2333 CC Leiden, The Netherlands

<sup>6</sup> Department of Cell Biology and Biophysics, Faculty of Biology, National and Kapodistrian University of Athens, 15784 Athens, Greece

<sup>7</sup> Institut de Chimie des Substances Naturelles, CNRS UPR 2301, Université Paris-Saclay, 1, av. de la Terrasse, 91198 Gif-sur-Yvette, France

\* Correspondence: anne.bialecki@univ-reunion.fr

|                                                                                                                                                                                           |    |
|-------------------------------------------------------------------------------------------------------------------------------------------------------------------------------------------|----|
| Figure S1. HRMS-ESI <sup>+</sup> spectrum of sinularone J (1).                                                                                                                            | 1  |
| Figure S2. <sup>1</sup> H NMR spectrum of sinularone J (1) (600 MHz, in CD <sub>3</sub> OD).                                                                                              | 2  |
| Figure S3. <sup>13</sup> C NMR spectrum of sinularone J (1) (150 MHz, in CD <sub>3</sub> OD).                                                                                             | 3  |
| Figure S4. <sup>1</sup> H- <sup>1</sup> H COSY spectrum of sinularone J (1) (600 MHz, in CD <sub>3</sub> OD).                                                                             | 4  |
| Figure S5. HSQC spectrum of sinularone J (1) (600 MHz, in CD <sub>3</sub> OD).                                                                                                            | 5  |
| Figure S6. HMBC spectrum of sinularone J (1) (600 MHz, in CD <sub>3</sub> OD).                                                                                                            | 6  |
| Figure S7. HRMS-ESI <sup>+</sup> spectrum of sinularone K (2).                                                                                                                            | 7  |
| Figure S8. <sup>1</sup> H NMR spectrum of sinularone K (2) (600 MHz, in CD <sub>3</sub> OD).                                                                                              | 8  |
| Figure S9. <sup>1</sup> H- <sup>1</sup> H COSY spectrum of sinularone K (2) (600 MHz, in CD <sub>3</sub> OD).                                                                             | 9  |
| Figure S10. HSQC spectrum of sinularone K (2) (600 MHz, in CD <sub>3</sub> OD).                                                                                                           | 10 |
| Figure S11. HMBC spectrum of sinularone K (2) (600 MHz, in CD <sub>3</sub> OD).                                                                                                           | 11 |
| Figure S12. HRMS-ESI-TOF spectrum of 1-O-octadecyl-2-pentanoyl- <i>sn</i> -glycero-3-phosphocholine (3).                                                                                  | 12 |
| Figure S13. <sup>1</sup> H NMR spectrum of 1-O-octadecyl-2-pentanoyl- <i>sn</i> -glycero-3-phosphocholine (3) (600 MHz, in CD <sub>3</sub> OD).                                           | 13 |
| Figure S14. <sup>1</sup> H- <sup>1</sup> H COSY spectrum of 1-O-octadecyl-2-pentanoyl- <i>sn</i> -glycero-3-phosphocholine (3) (600 MHz, in CD <sub>3</sub> OD).                          | 14 |
| Figure S15. HSQC spectrum of 1-O-octadecyl-2-pentanoyl- <i>sn</i> -glycero-3-phosphocholine (3) (600 MHz, in CD <sub>3</sub> OD).                                                         | 14 |
| Figure S16. HMBC spectrum of 1-O-octadecyl-2-pentanoyl- <i>sn</i> -glycero-3-phosphocholine (3) (600 MHz, in CD <sub>3</sub> OD).                                                         | 15 |
| Figure S17. HRMS ESI-TOF spectrum of 1-O-(3-methox-tetradecanoyl)- <i>sn</i> -glycero-3-phosphocholine (4).                                                                               | 16 |
| Figure S18. <sup>1</sup> H NMR spectrum of 1-O-(3-methox-tetradecanoyl)- <i>sn</i> -glycero-3-phosphocholine (4) (600 MHz, in CD <sub>3</sub> OD).                                        | 16 |
| Figure S19. <sup>1</sup> H- <sup>1</sup> H COSY spectrum of 1-O-(3-methox-tetradecanoyl)- <i>sn</i> -glycero-3-phosphocholine (4) (600 MHz, in CD <sub>3</sub> OD).                       | 18 |
| Figure S20. HSQC spectrum of 1-O-(3-methox-tetradecanoyl)- <i>sn</i> -glycero-3-phosphocholine (4) (600 MHz, in CD <sub>3</sub> OD).                                                      | 18 |
| Figure S21. HRMS ESI-TOF of 1-O-octadecyl- <i>sn</i> -glycero-3-phosphocholine (5).                                                                                                       | 19 |
| Figure S22. <sup>1</sup> H NMR spectrum of compound 1-O-octadecyl- <i>sn</i> -glycero-3-phosphocholine (5) (600 MHz, in CD <sub>3</sub> OD).                                              | 20 |
| Figure S23. HRMS-ESI <sup>+</sup> spectrum of compound 1-palmitoyl- <i>sn</i> -glycero-3-phosphocholine (6).                                                                              | 21 |
| Figure S24. <sup>1</sup> H NMR spectrum of compound 1-palmitoyl- <i>sn</i> -glycero-3-phosphocholine (6) (600 MHz, in CD <sub>3</sub> OD).                                                | 21 |
| Figure S25. HRMS-ESI <sup>+</sup> spectrum of compound 1-O-hexadecylglycerol (7).                                                                                                         | 22 |
| Figure S26. <sup>1</sup> H NMR spectrum of compound 1-O-hexadecylglycerol (7) (600 MHz, in CD <sub>3</sub> OD).                                                                           | 22 |
| Figure S27. HRMS-ESI <sup>+</sup> spectrum of compound 1-O-octadecylglycerol (8).                                                                                                         | 24 |
| Figure S28. <sup>1</sup> H NMR spectrum of compound 1-O-octadecylglycerol (8) (600 MHz, in CD <sub>3</sub> OD).                                                                           | 25 |
| Figure S29. HRMS-ESI <sup>+</sup> spectrum of compound 3-nonadecyloxy-1,2-propanediol (9).                                                                                                | 26 |
| Figure S30. <sup>1</sup> H NMR spectrum of compound 3-nonadecyloxy-1,2-propanediol (9) (600 MHz, in CD <sub>3</sub> OD).                                                                  | 27 |
| Figure S31. HRMS-ESI <sup>+</sup> spectrum of compound 3-icosoxypropane-1,2-diol (10).                                                                                                    | 28 |
| Figure S32. <sup>1</sup> H NMR spectrum of compound 3-icosoxypropane-1,2-diol (10) (600 MHz, in CD <sub>3</sub> OD).                                                                      | 29 |
| Figure S33. HRMS-ESI <sup>+</sup> spectrum of compound 5 $\alpha$ ,8 $\alpha$ -epidioxy-24( <i>R/S</i> )-hydroperoxystigmasta-6,28-dien-3 $\beta$ -ol (11).                               | 30 |
| Figure S34. <sup>1</sup> H NMR spectrum of compound 5 $\alpha$ ,8 $\alpha$ -epidioxy-24( <i>R/S</i> )-hydroperoxystigmasta-6,28-dien-3 $\beta$ -ol (11) (600 MHz, in CD <sub>3</sub> OD). | 31 |
| Figure S35. HRMS-ESI <sup>+</sup> spectrum of compound 5 $\alpha$ ,8 $\alpha$ -epidioxy-24( <i>R/S</i> )-stigmasta-6,22 <i>E</i> -dien-3 $\beta$ -ol (12).                                | 32 |
| Figure S36. <sup>1</sup> H NMR spectrum of compound 5 $\alpha$ ,8 $\alpha$ -epidioxy-24( <i>R/S</i> )-stigmasta-6,22 <i>E</i> -dien-3 $\beta$ -ol (12) (600 MHz, in CD <sub>3</sub> OD).  | 33 |
| Figure S37. <sup>1</sup> H NMR spectrum of compound cyclo(Val-Leu) (13) (600 MHz, in CD <sub>3</sub> OD).                                                                                 | 34 |
| Figure S38. <sup>1</sup> H NMR spectrum of compound cyclo(Val-Phe) (14) (600 MHz, in CD <sub>3</sub> OD).                                                                                 | 35 |
| Figure S39. Dereplication of <i>Scopalina hapalia</i> fractions using LC-MS/MS molecular networking.                                                                                      | 36 |
| Figure S40. Dereplication of <i>Scopalina hapalia</i> fractions using LC-MS/MS molecular networking.                                                                                      | 37 |

MAY13-165-RP-F07-C56\_Mex3 18 (0.440) AM2 (Ar,18000.0,0.00,0.00); Cm (1:20)  
[M+Na]<sup>+</sup>

1: TOF MS ES<sup>+</sup>  
3.26e6

**349.1985**

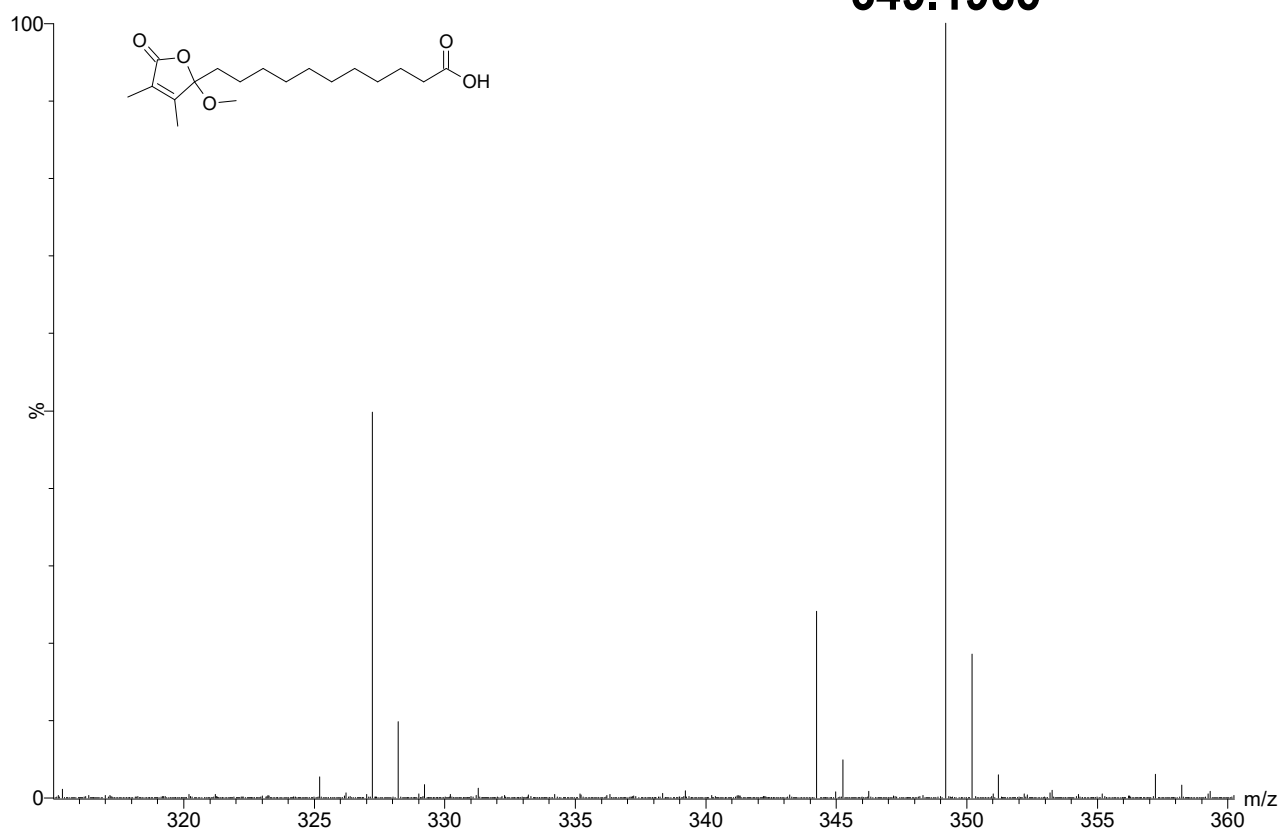

**Figure S1.** HRMS-ESI<sup>+</sup> spectrum of sinularone J (1).

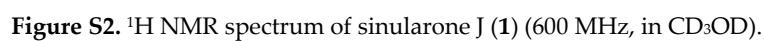

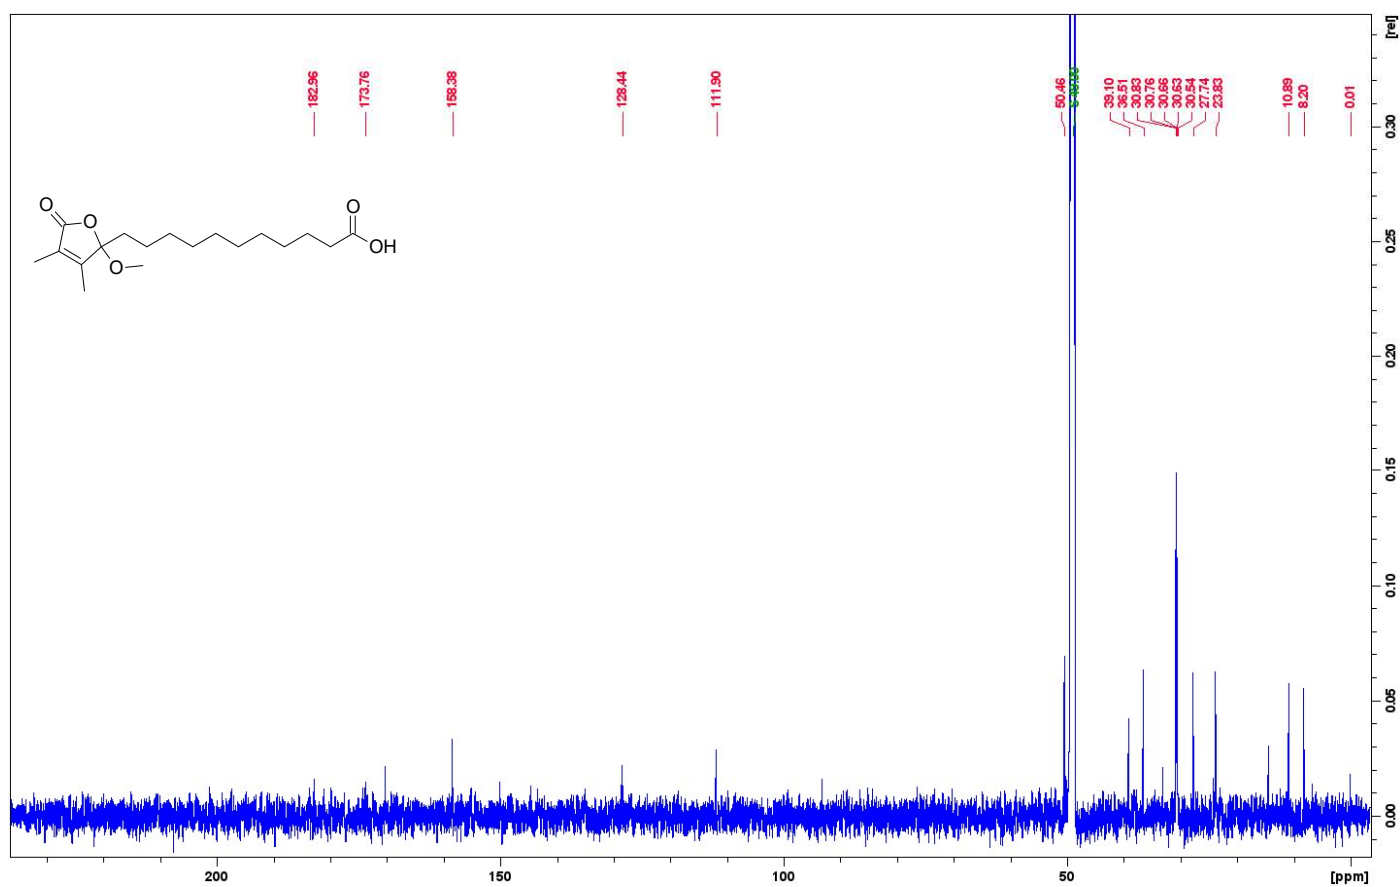

Figure S3. <sup>13</sup>C NMR spectrum of sinularone J (1) (150 MHz, in CD<sub>3</sub>OD).

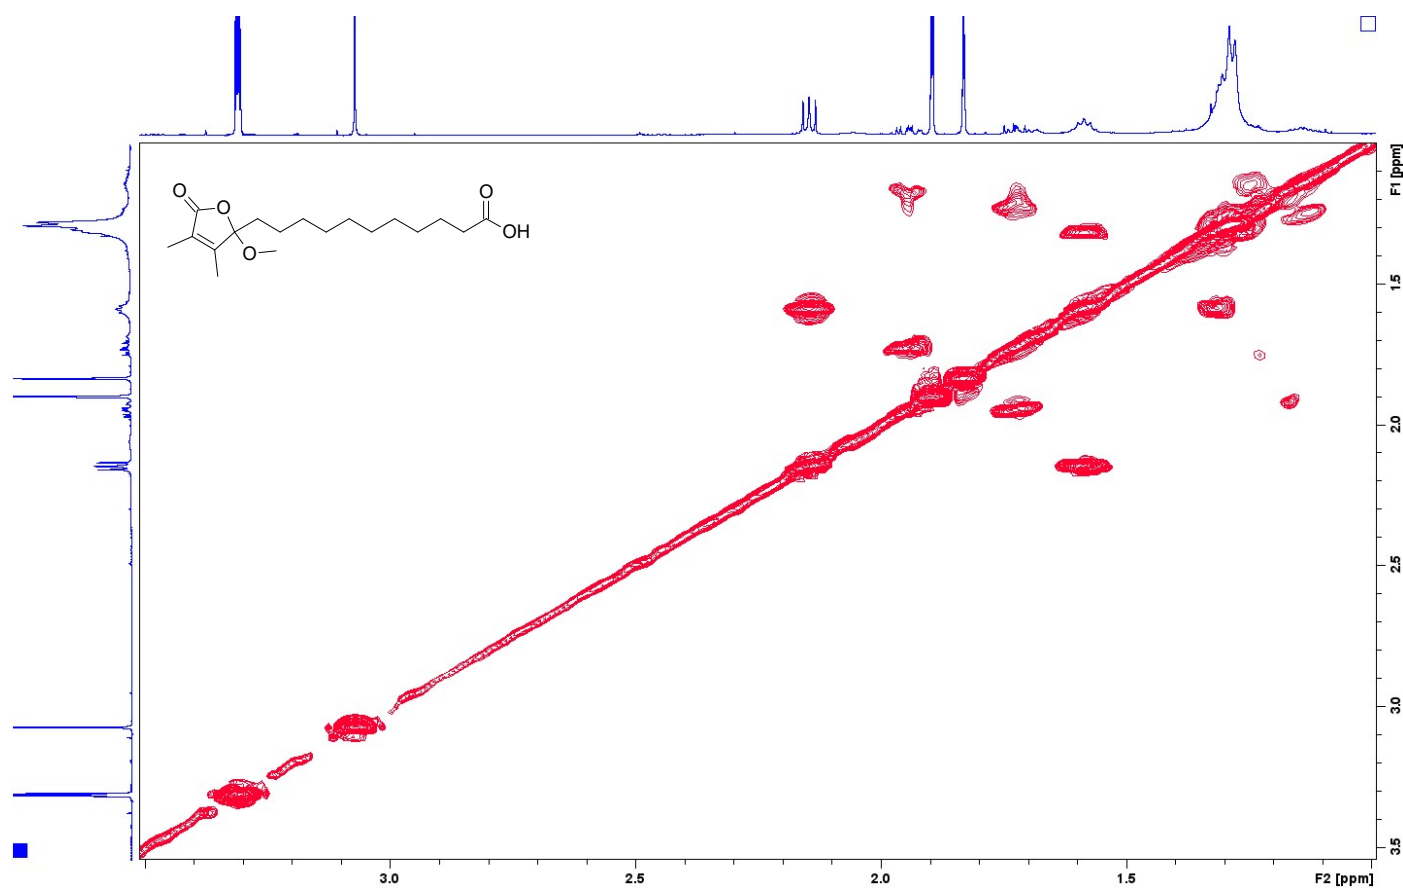

**Figure S4.**  $^1\text{H}$ - $^1\text{H}$  COSY spectrum of sinularone J (1) (600 MHz, in  $\text{CD}_3\text{OD}$ ).

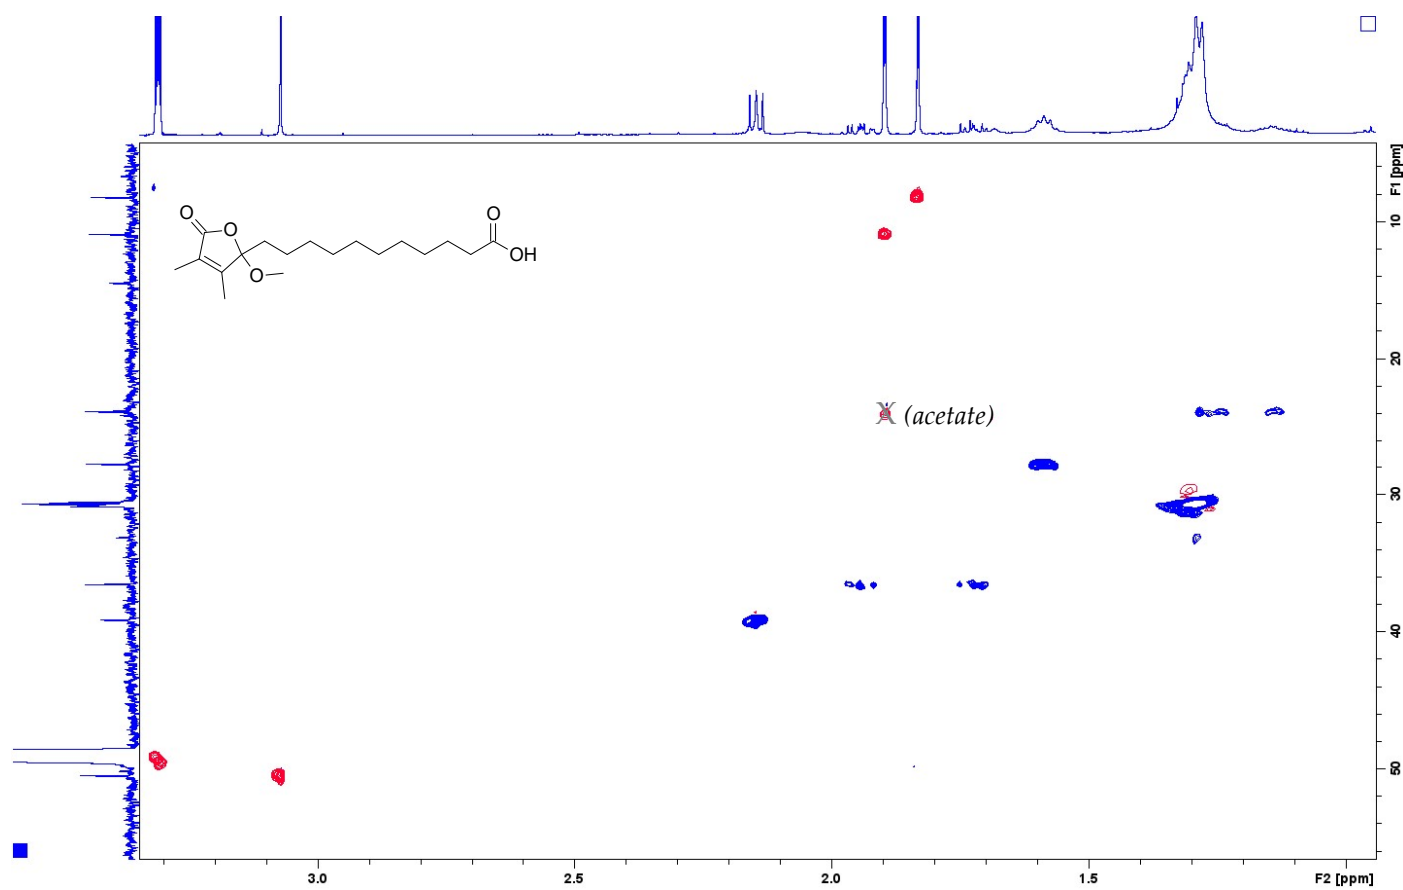

Figure S5. HSQC spectrum of sinularone J (1) (600 MHz, in  $\text{CD}_3\text{OD}$ ).

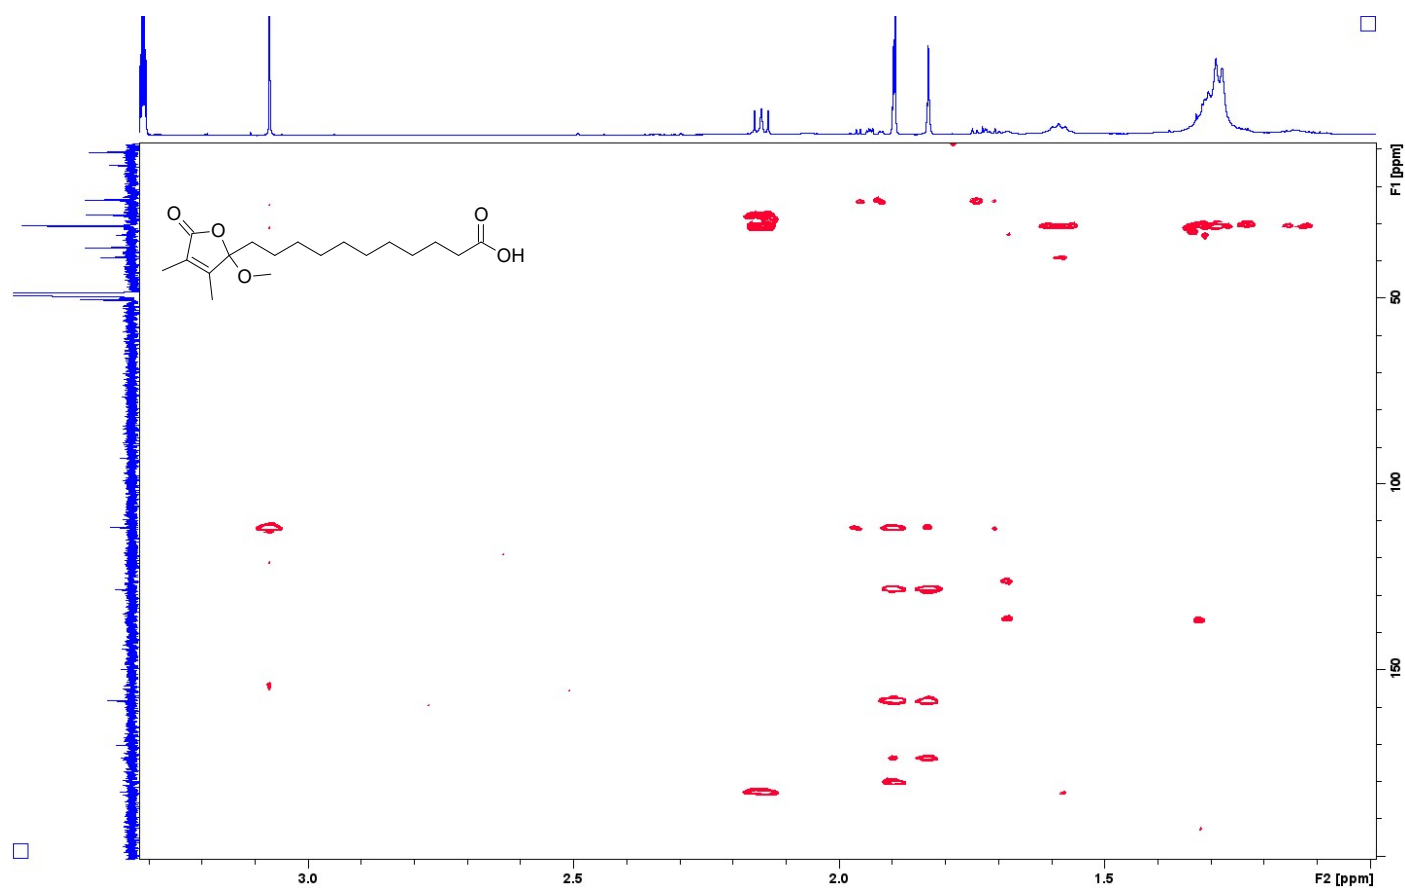

**Figure S6.** HMBC spectrum of sinularone J (**1**) (600 MHz, in CD<sub>3</sub>OD).



1: TOF MS ES+  
3.20e6

**433.2921**

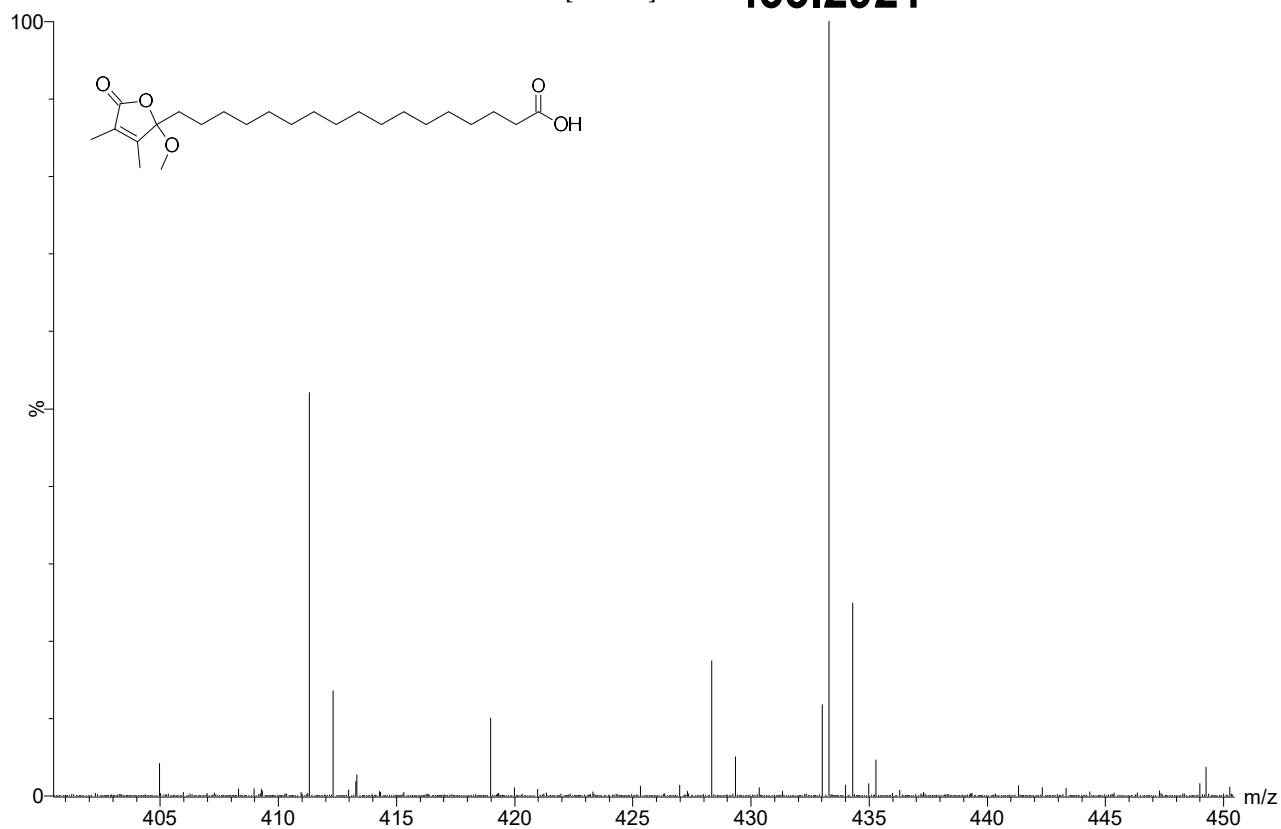

**Figure S7.** HRMS-ESI<sup>+</sup> spectrum of sinularone K (2).

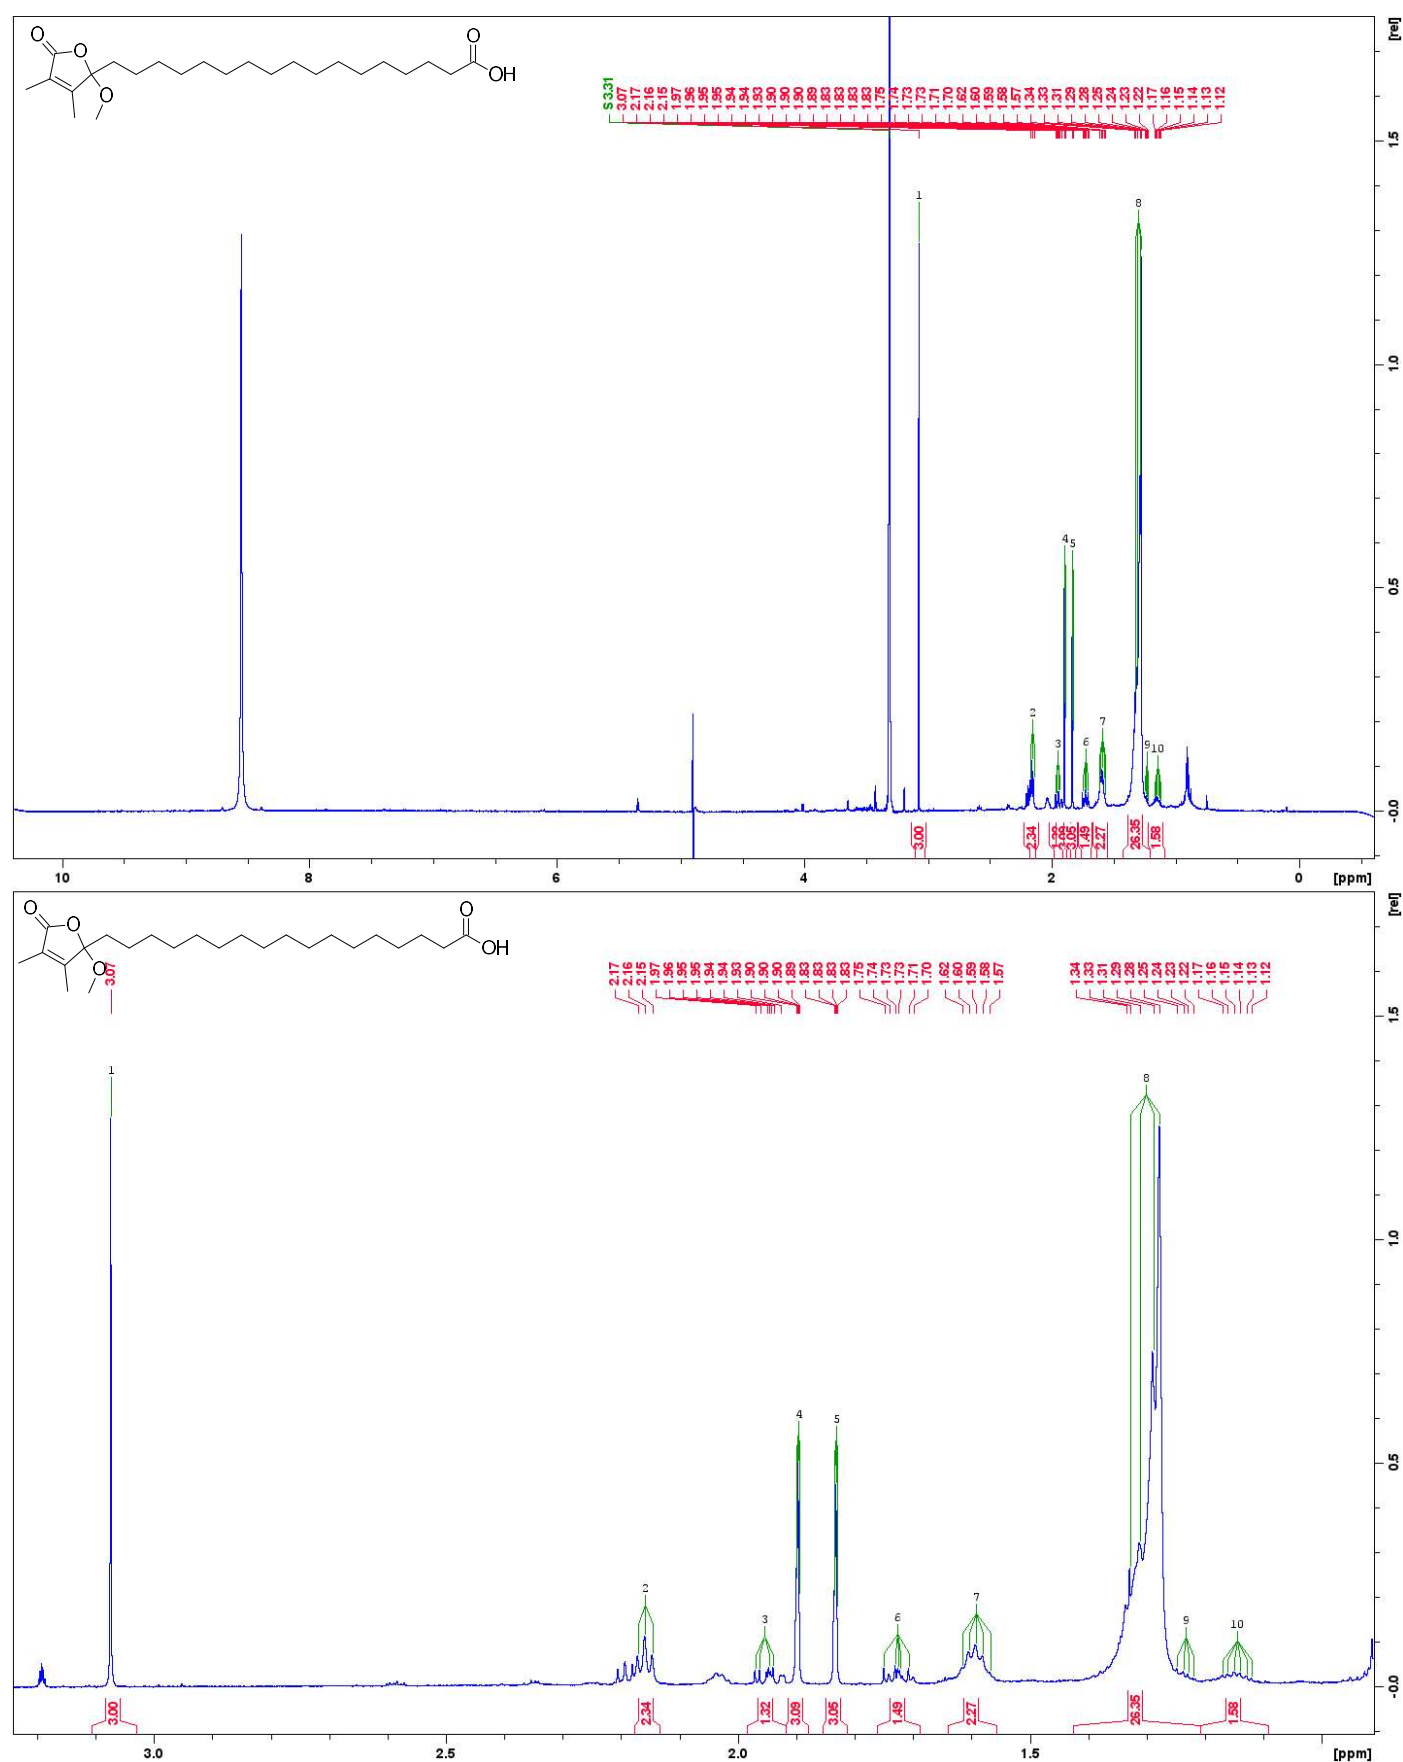

Figure S8.  $^1\text{H}$  NMR spectrum of sinularone K (2) (600 MHz, in  $\text{CD}_3\text{OD}$ ).

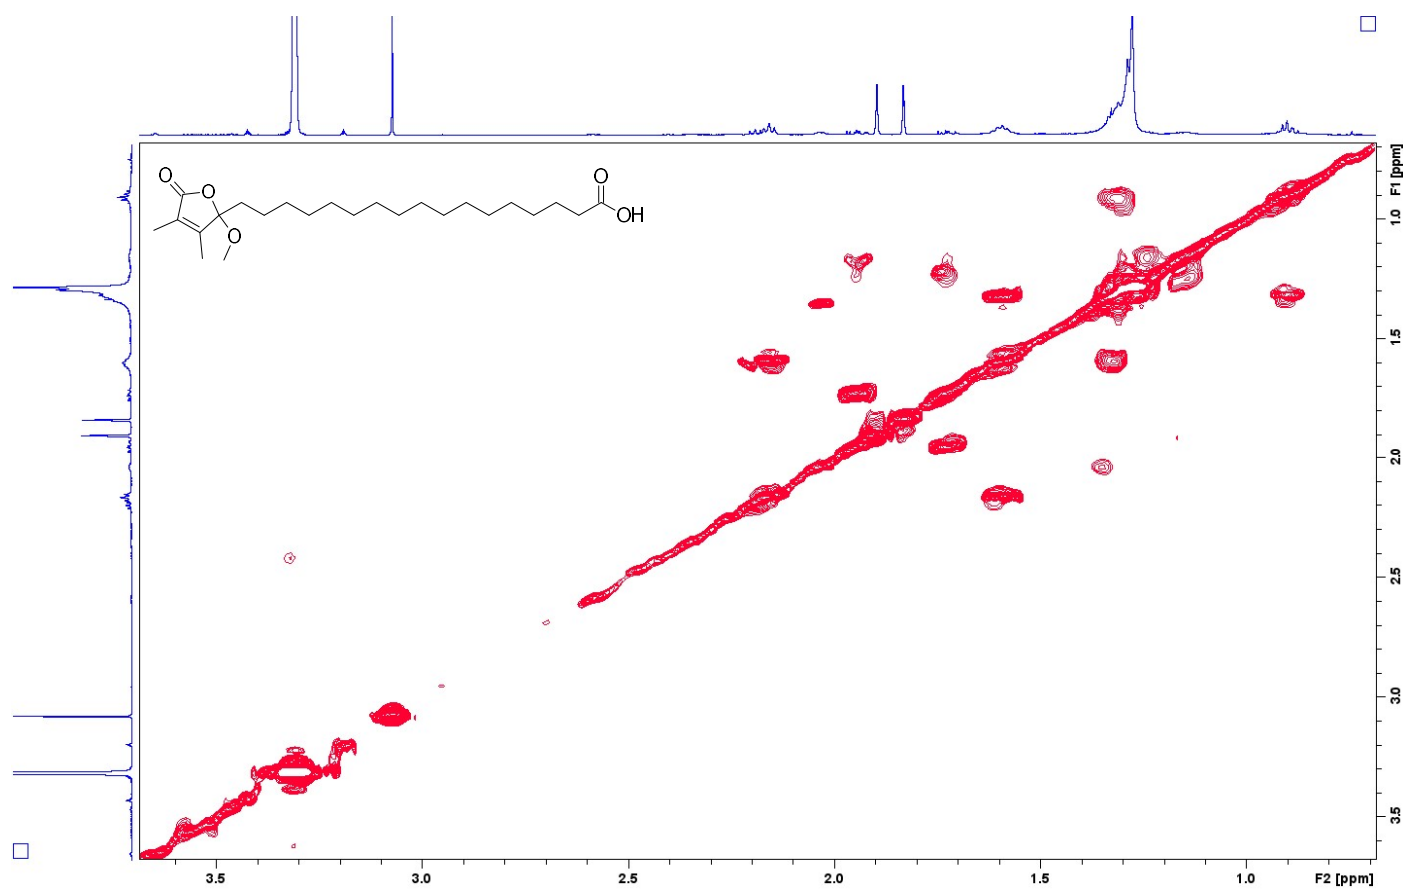

**Figure S9.**  $^1\text{H}$ - $^1\text{H}$  COSY spectrum of sinularone K (**2**) (600 MHz, in  $\text{CD}_3\text{OD}$ ).

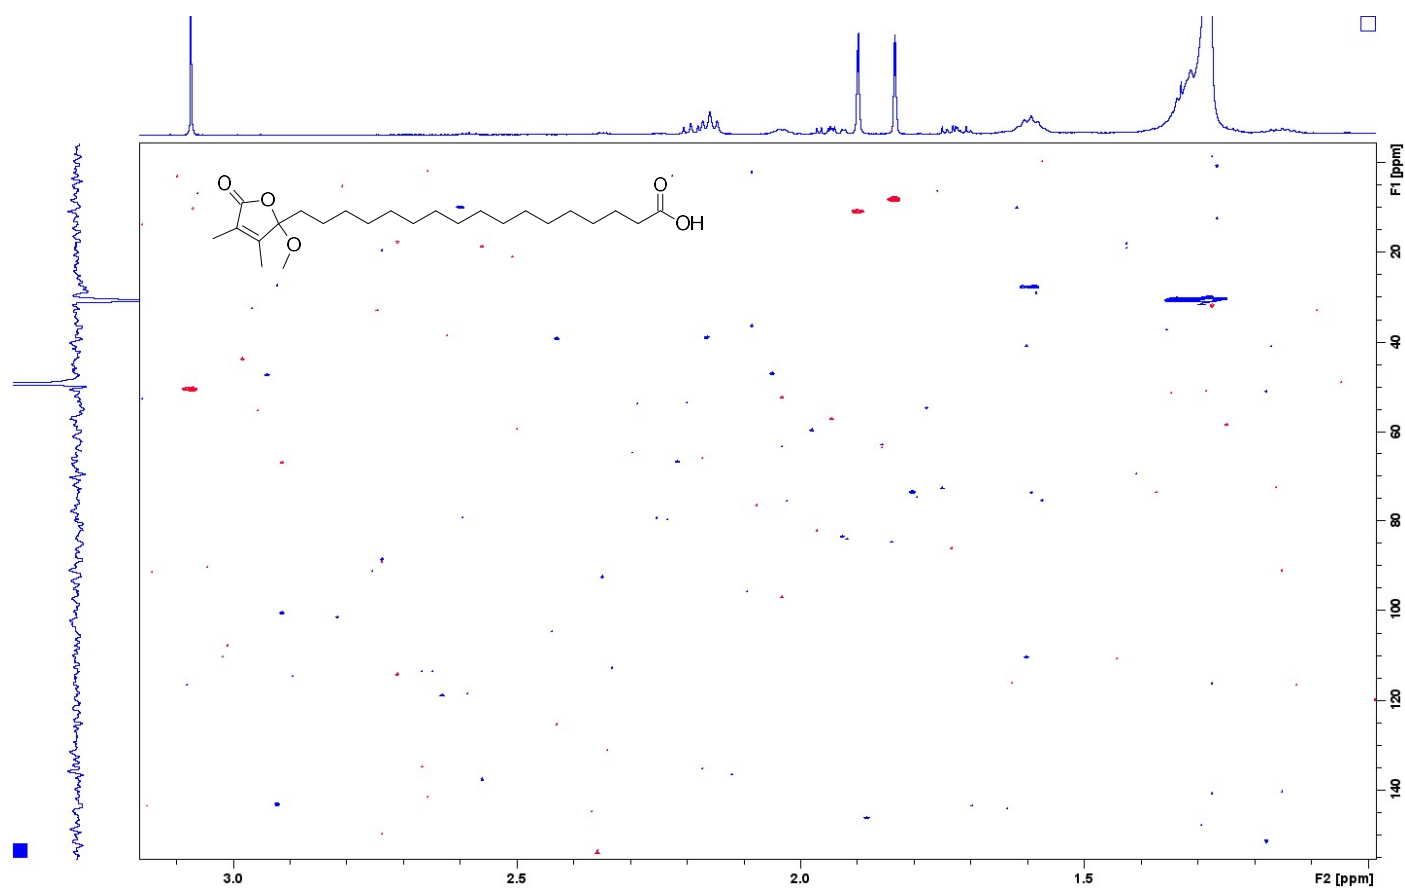

**Figure S10.** HSQC spectrum of sinularone K (2) (600 MHz, in  $\text{CD}_3\text{OD}$ ).

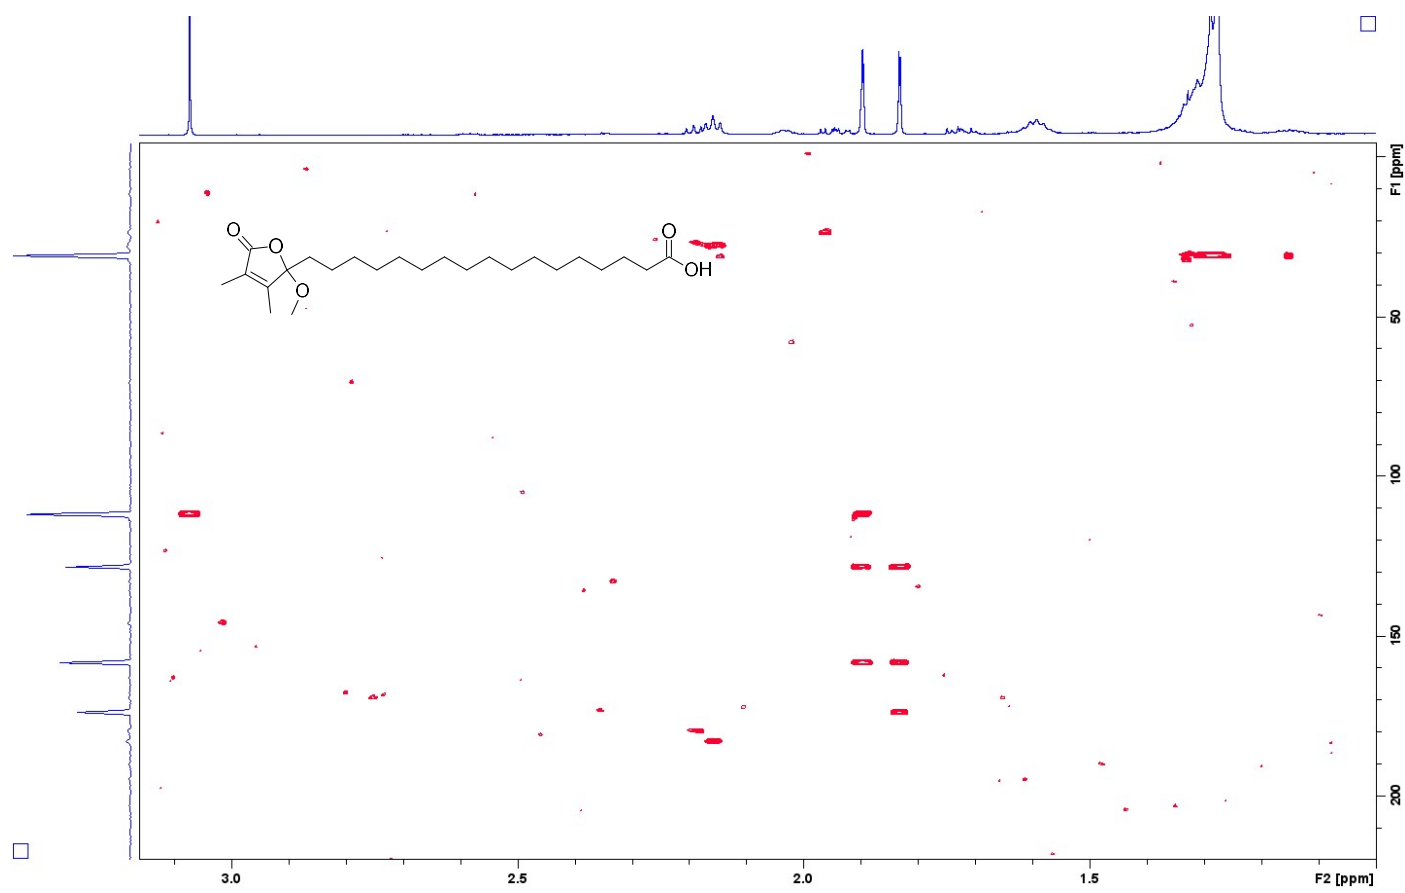

**Figure S11.** HMBC spectrum of sinularone K (**2**) (600 MHz, in CD<sub>3</sub>OD).

NP\_F10-C8\_Mex2 4 (0.123) AM2 (Ar,18000.0,0.00,0.00); Cm (1:20)

1: TOF MS ES+  
9.33e5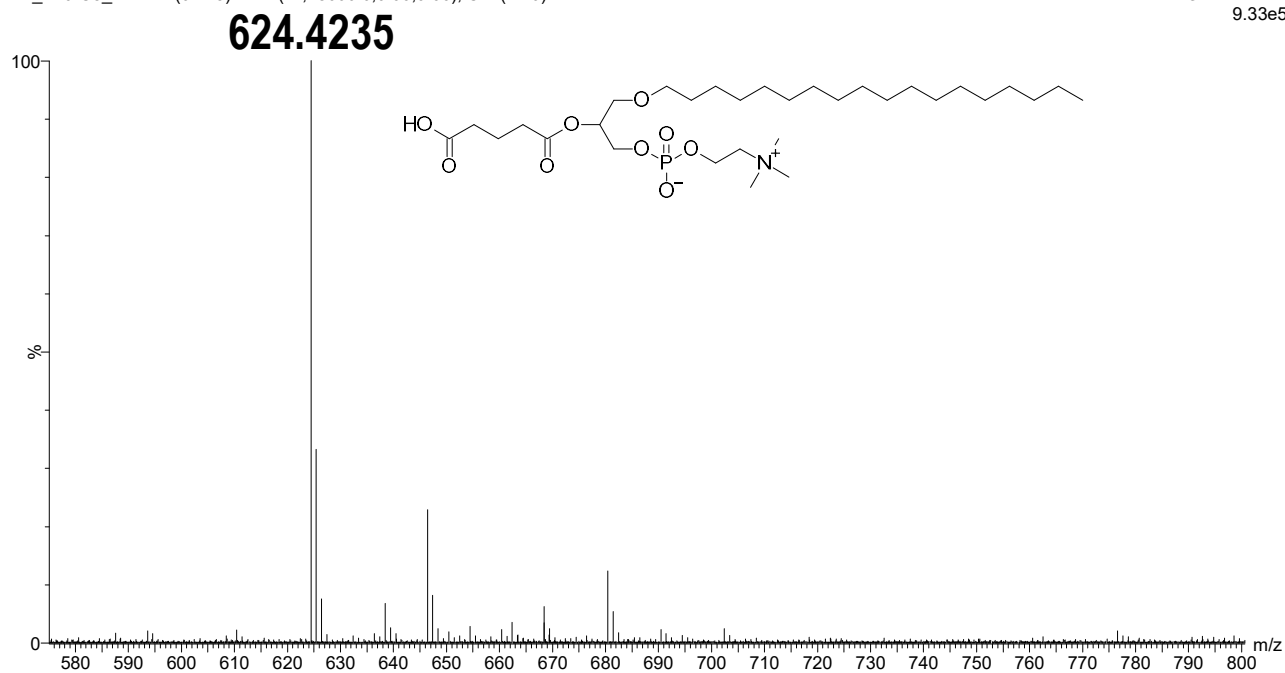

NP\_F10-C8\_DS\_624\_4\_30EV 7 (0.137) Cm (1:22)

TOF MSMS 624.40ES+  
1.46e5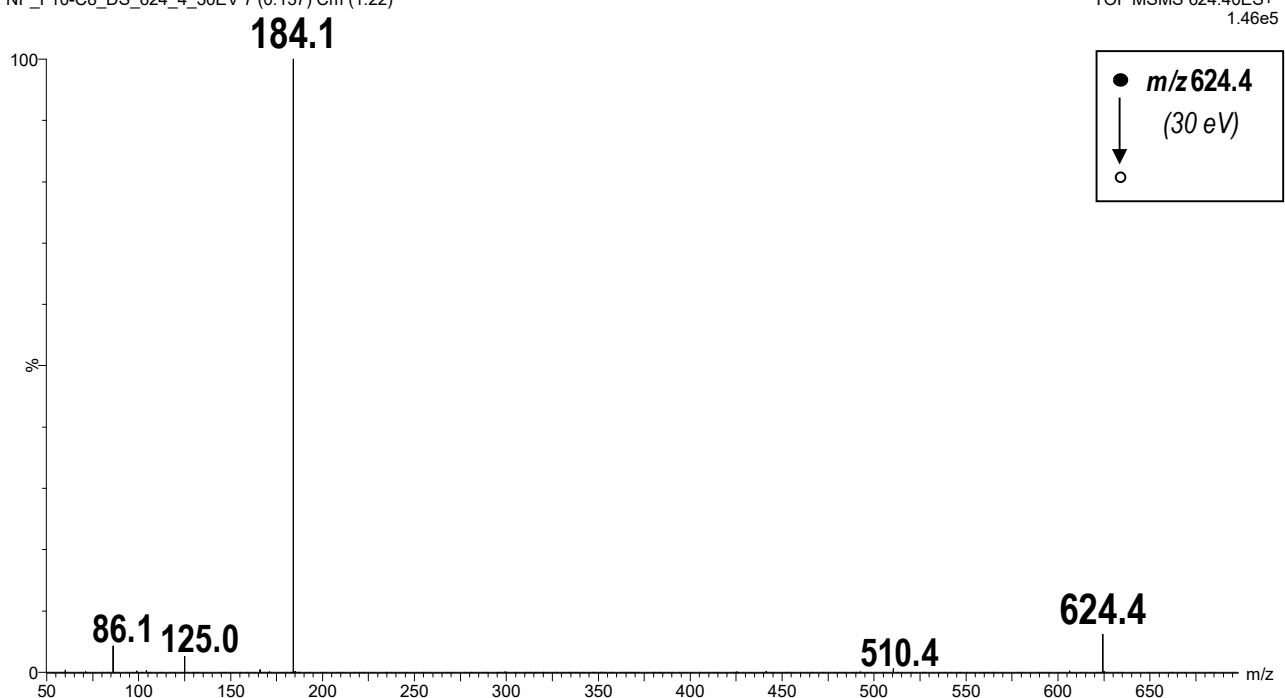

**Figure S12.** HRMS-ESI-TOF spectrum of 1-*O*-octadecyl-2-pentanoyl-*sn*-glycero-3-phosphocholine (3).

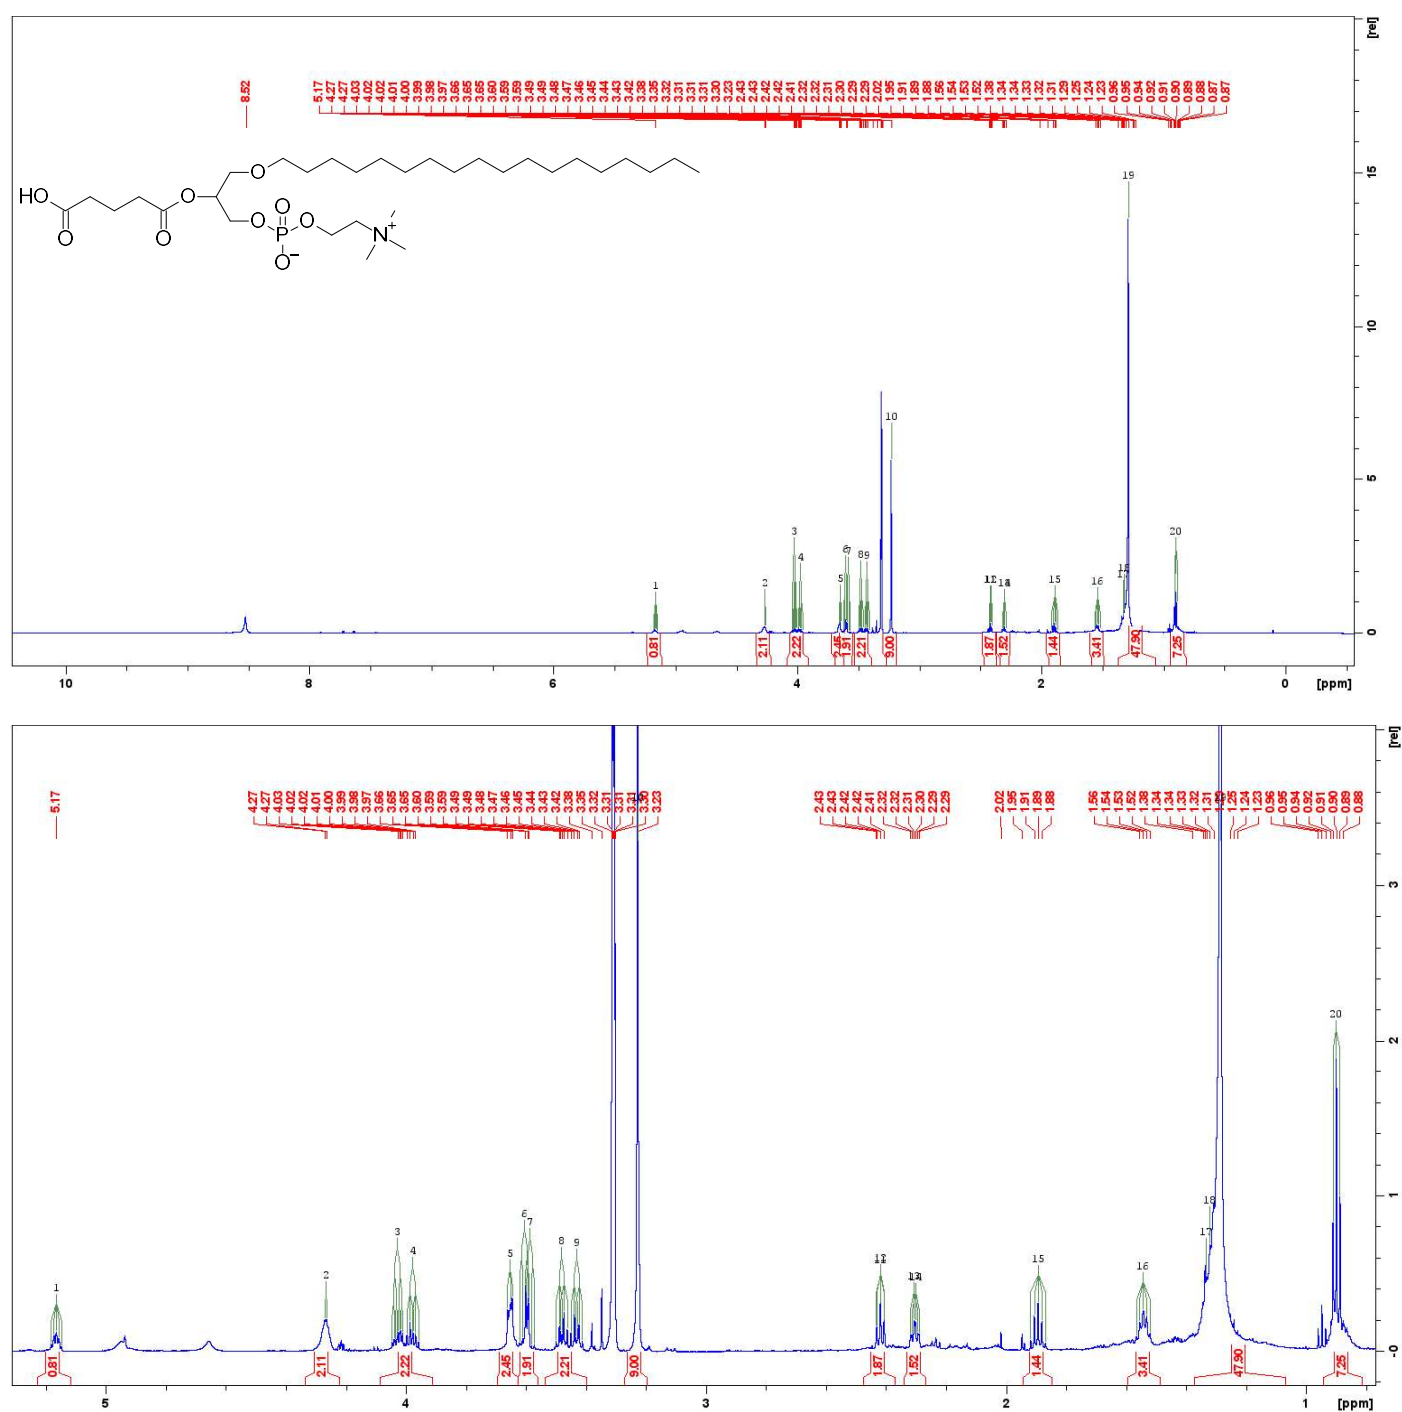

Figure S13.  $^1\text{H}$  NMR spectrum of 1-O-octadecyl-2-pentanoyl-*sn*-glycero-3-phosphocholine (3) (600 MHz, in  $\text{CD}_3\text{OD}$ ).

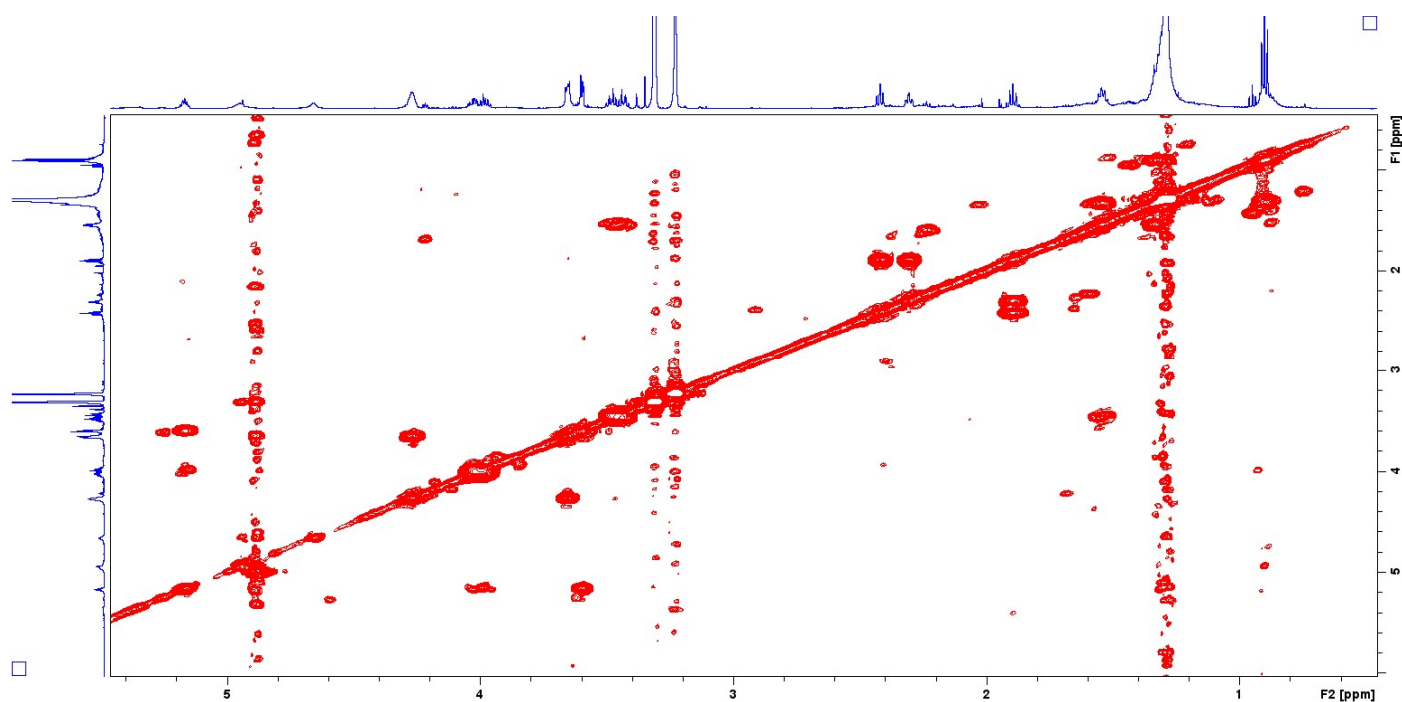

**Figure S14.**  $^1\text{H}$ - $^1\text{H}$  COSY spectrum of 1-*O*-octadecyl-2-pentanoyl-*sn*-glycero-3-phosphocholine (**3**) (600 MHz, in  $\text{CD}_3\text{OD}$ ).

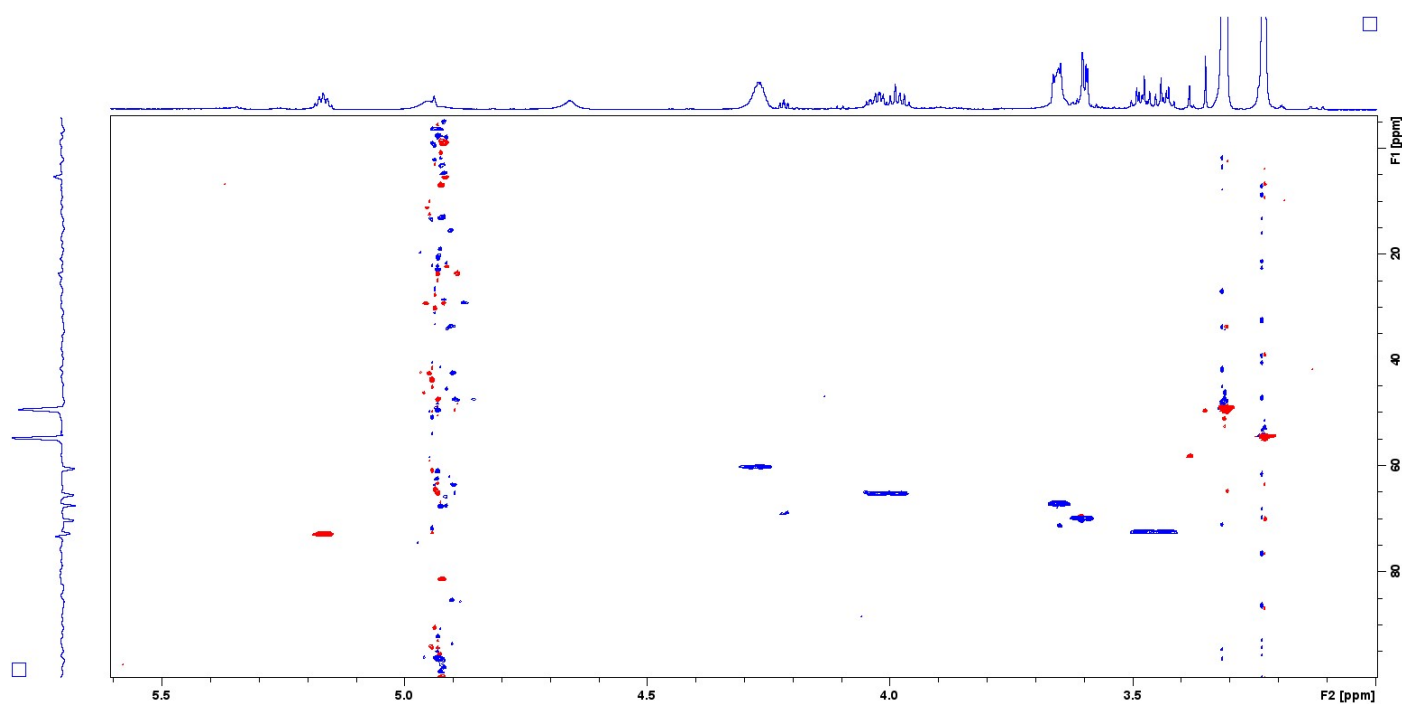

**Figure S15.** HSQC spectrum of 1-*O*-octadecyl-2-pentanoyl-*sn*-glycero-3-phosphocholine (**3**) (600 MHz, in  $\text{CD}_3\text{OD}$ ).



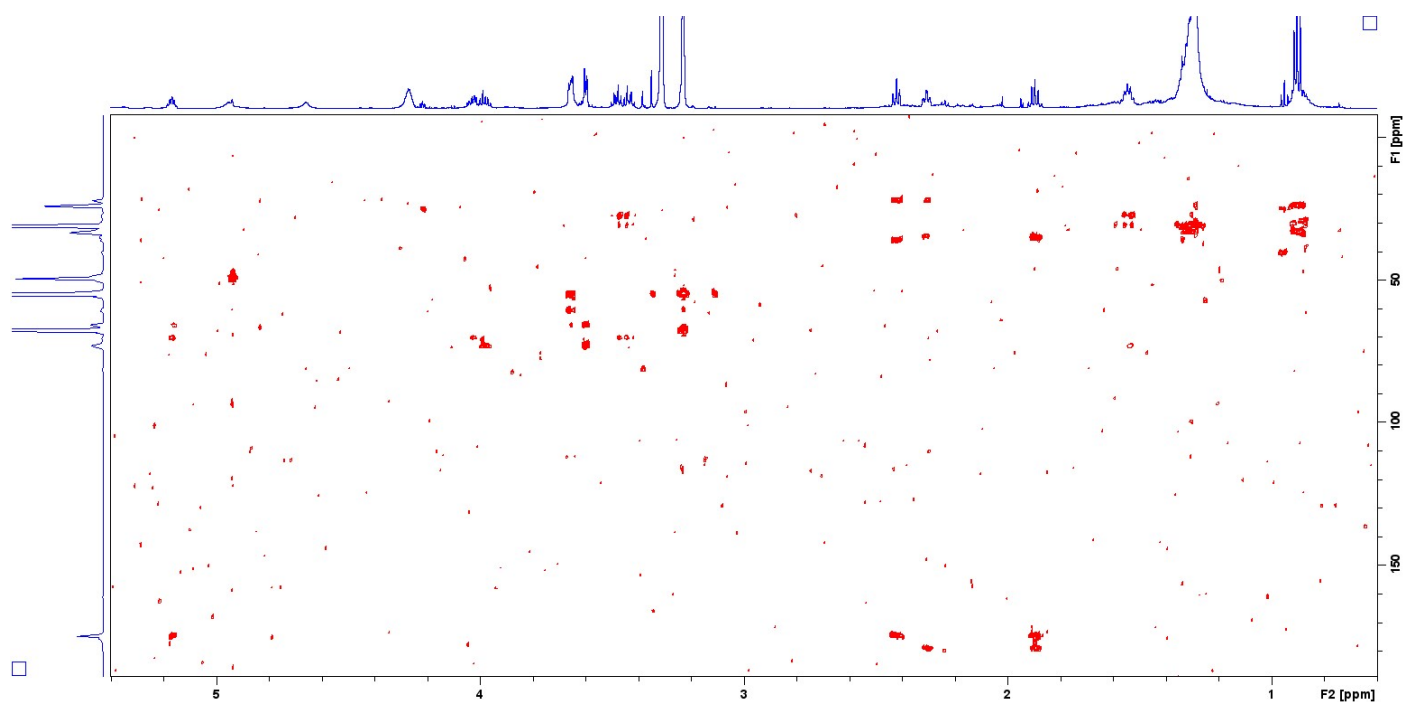

**Figure S16.** HMBC spectrum of 1-*O*-octadecyl-2-pentanoyl-*sn*-glycero-3-phosphocholine (**3**) (600 MHz, in CD<sub>3</sub>OD).

NP\_F10-C2\_Mex3 6 (0.157) AM2 (Ar,18000.0,0.00,0.00); Cm (1:20)

1: TOF MS ES+  
1.75e6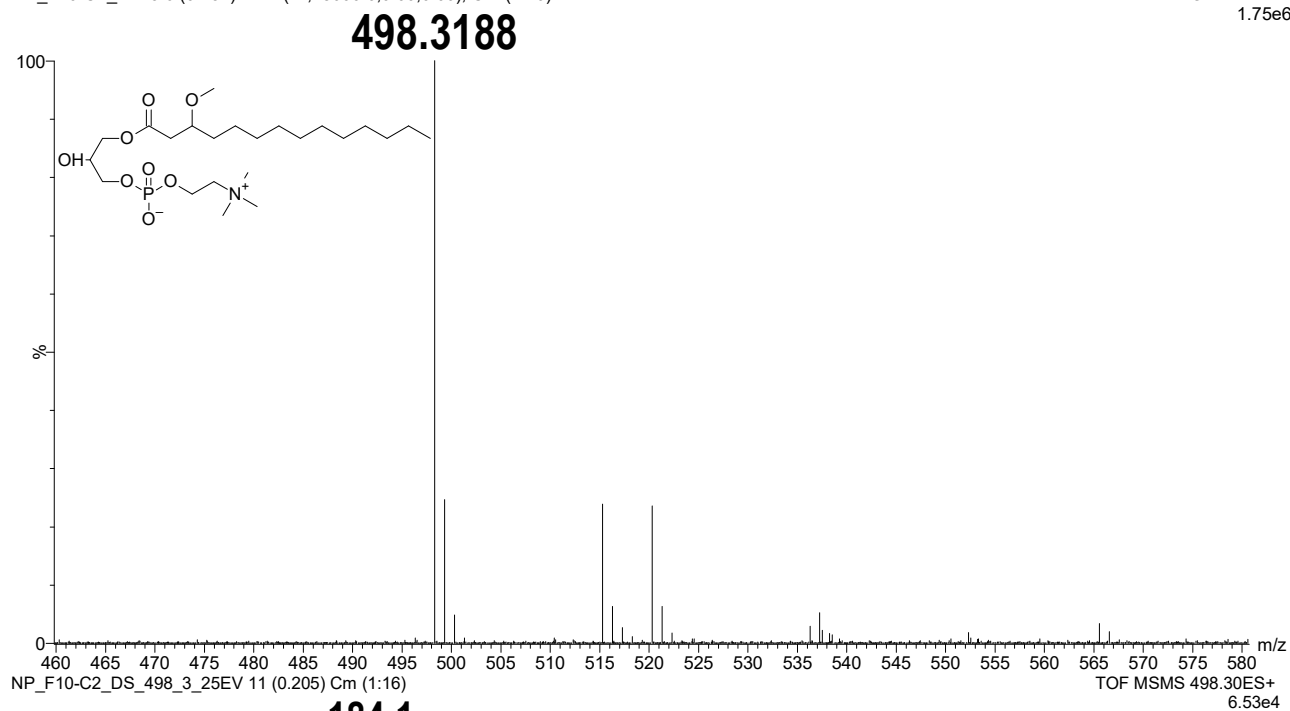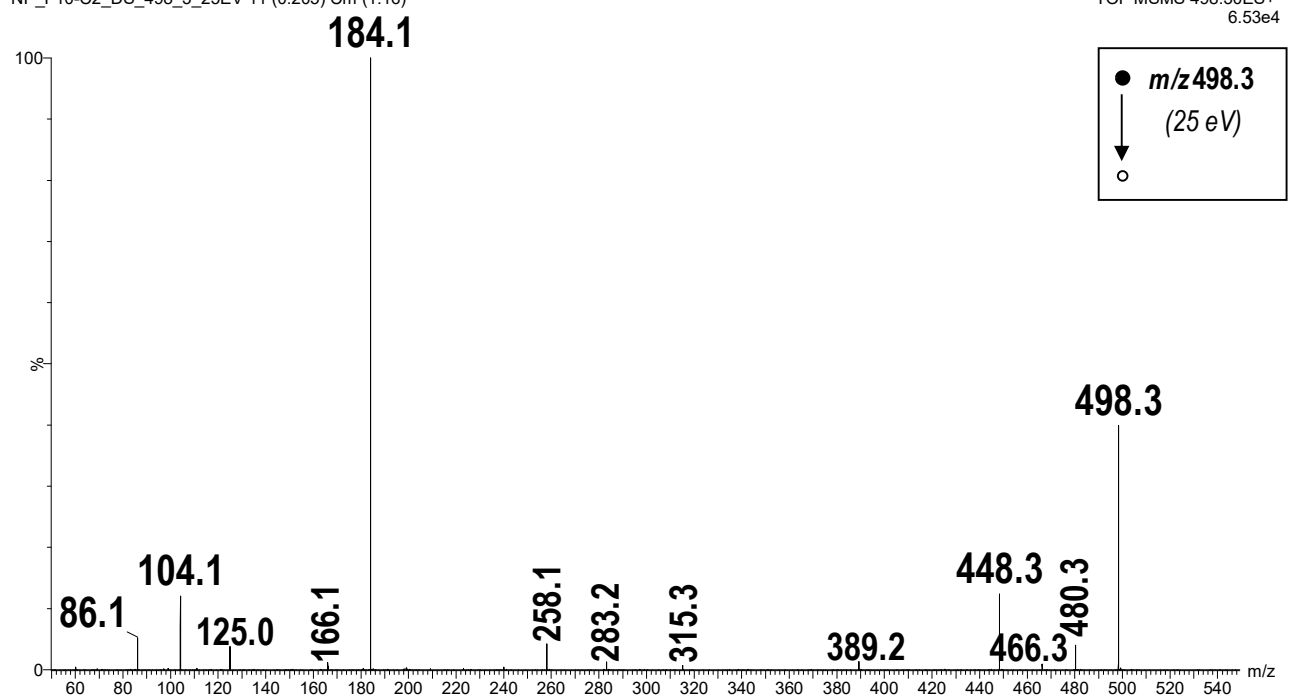

**Figure S17.** HRMS ESI-TOF spectrum of 1-O-(3-methoxy-tetradecanoyl)-*sn*-glycero-3-phosphocholine (4).

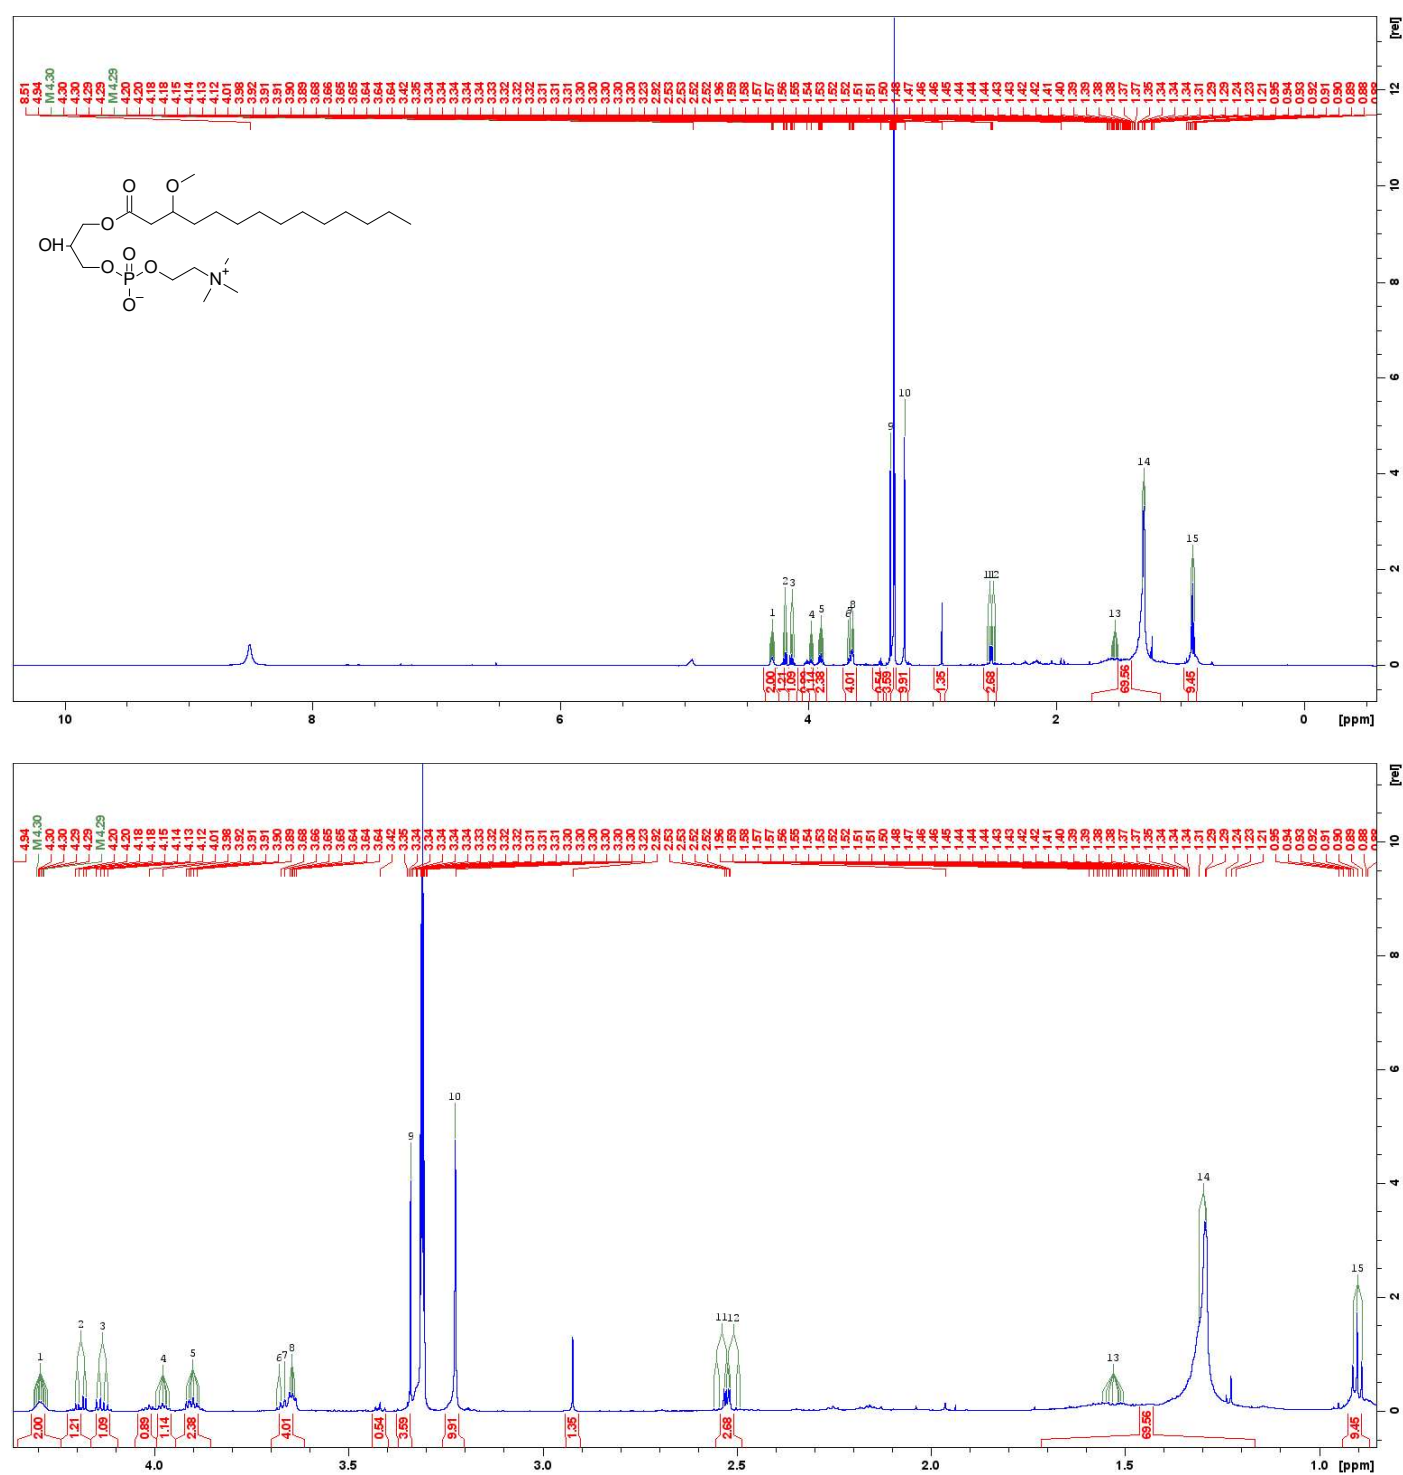

**Figure S18.**  $^1\text{H}$  NMR spectrum of 1-O-(3-methoxy-tetradecanoyl)-*sn*-glycero-3-phosphocholine (4) (600 MHz, in  $\text{CD}_3\text{OD}$ ).

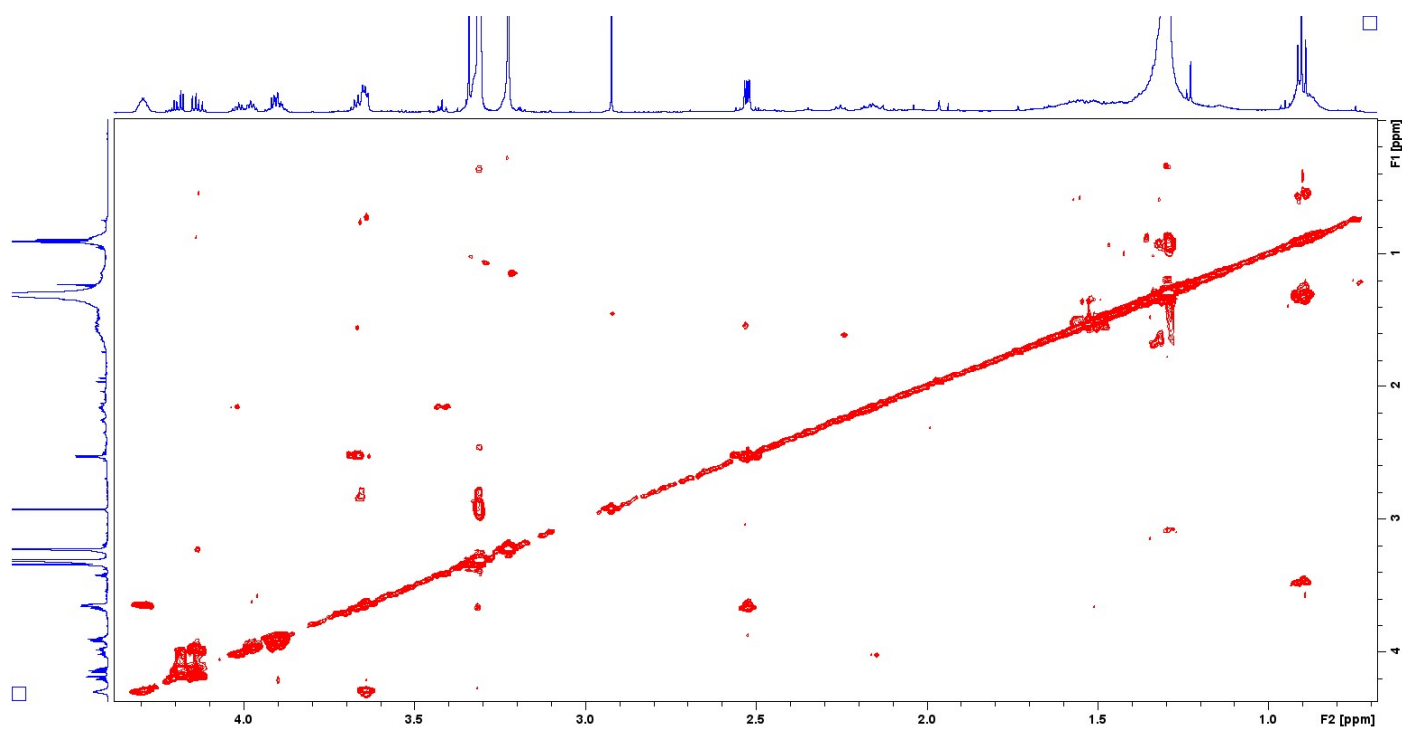

**Figure S19.**  $^1\text{H}$ - $^1\text{H}$  COSY spectrum of 1-O-(3-methoxy-tetradecanoyl)-*sn*-glycero-3-phosphocholine (4) (600 MHz, in  $\text{CD}_3\text{OD}$ ).

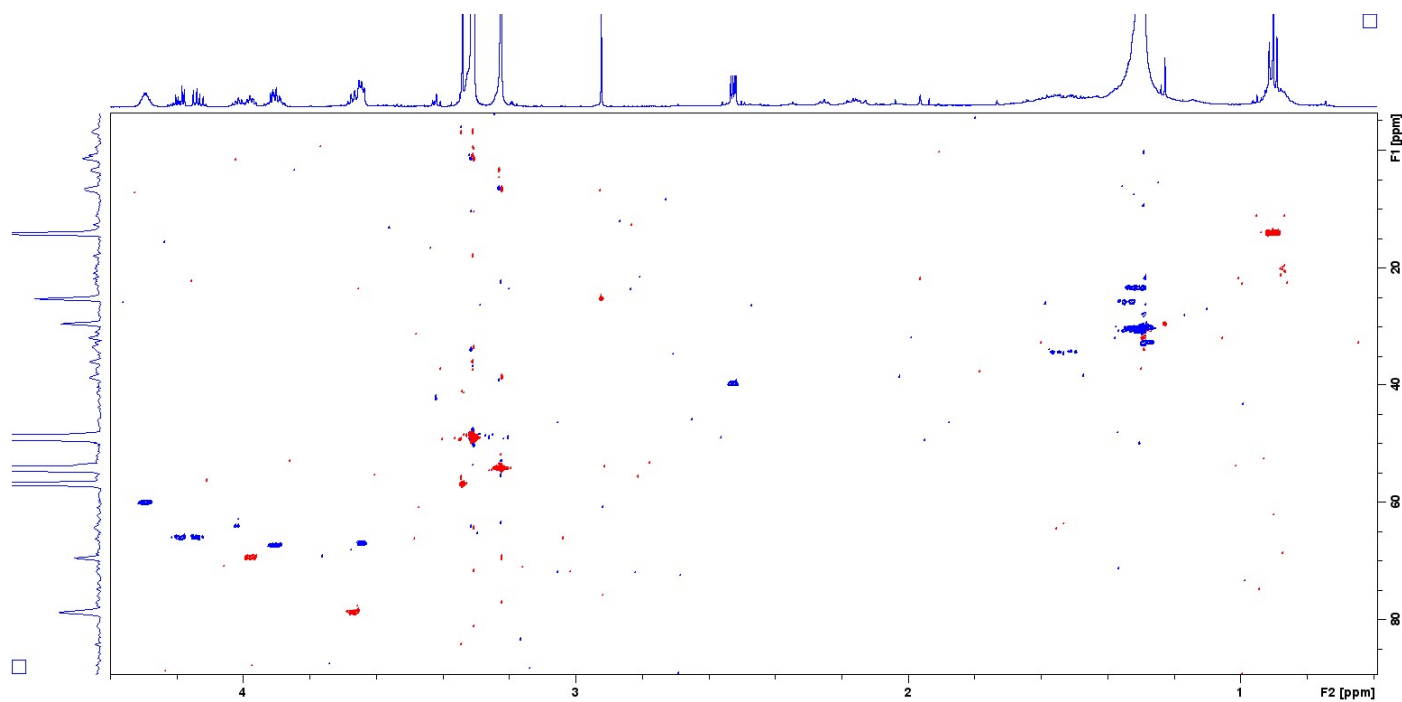

**Figure S20.** HSQC spectrum of 1-O-(3-methoxy-tetradecanoyl)-*sn*-glycero-3-phosphocholine (4) (600 MHz, in  $\text{CD}_3\text{OD}$ ).

NP\_F10-C7\_Mex1 7 (0.194) AM2 (Ar,18000.0,0.00,0.00); Cm (1:20)

1: TOF MS ES+  
4.05e6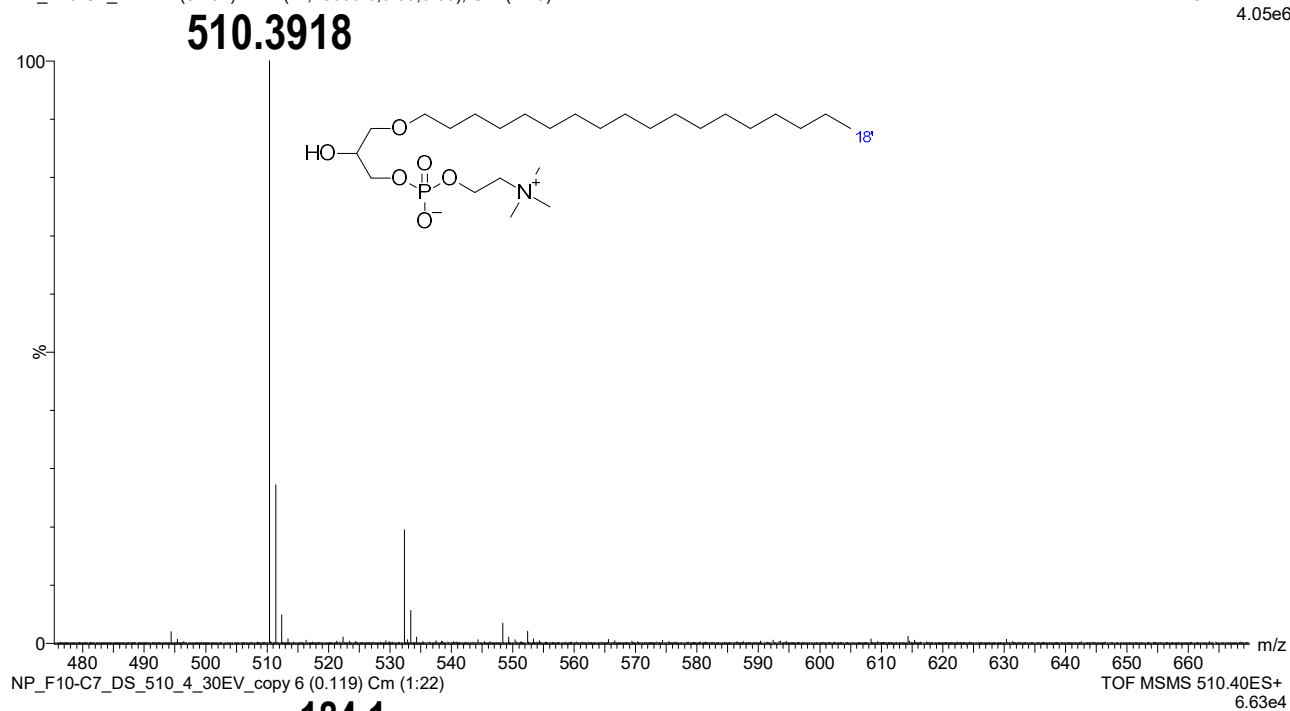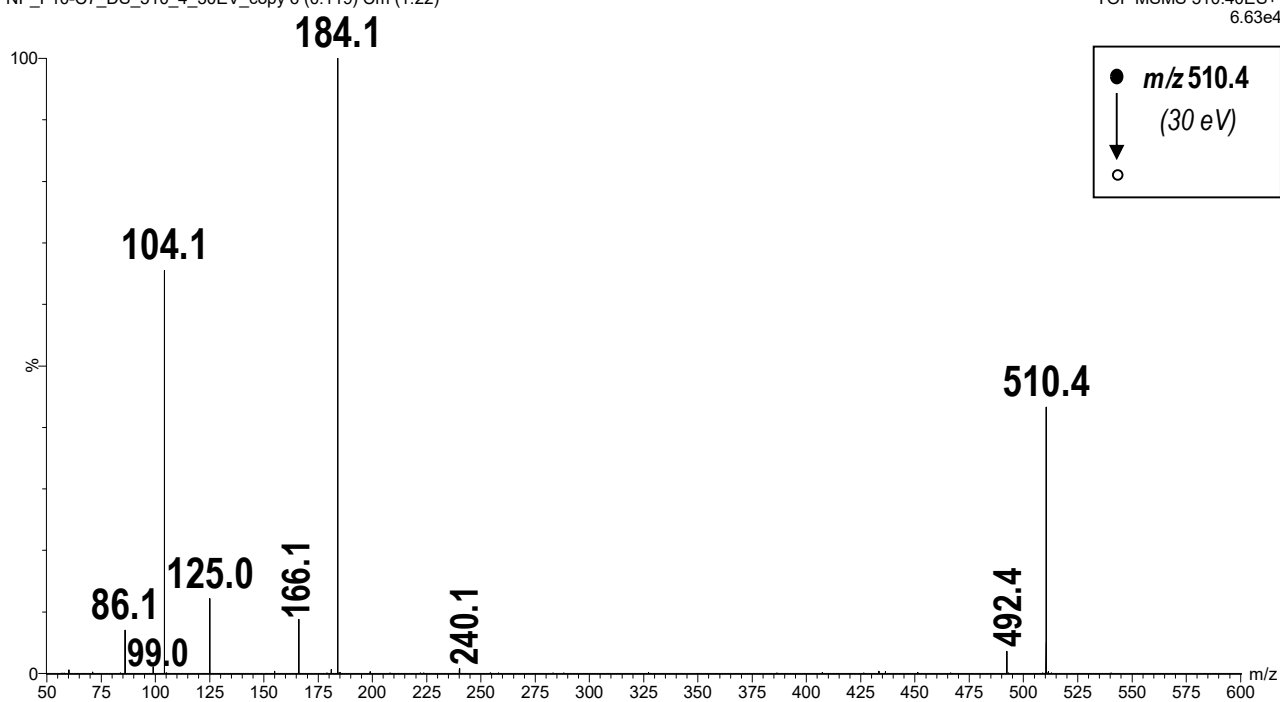Figure S21. HRMS ESI-TOF of 1-O-octadecyl-*sn*-glycero-3-phosphocholine (5).

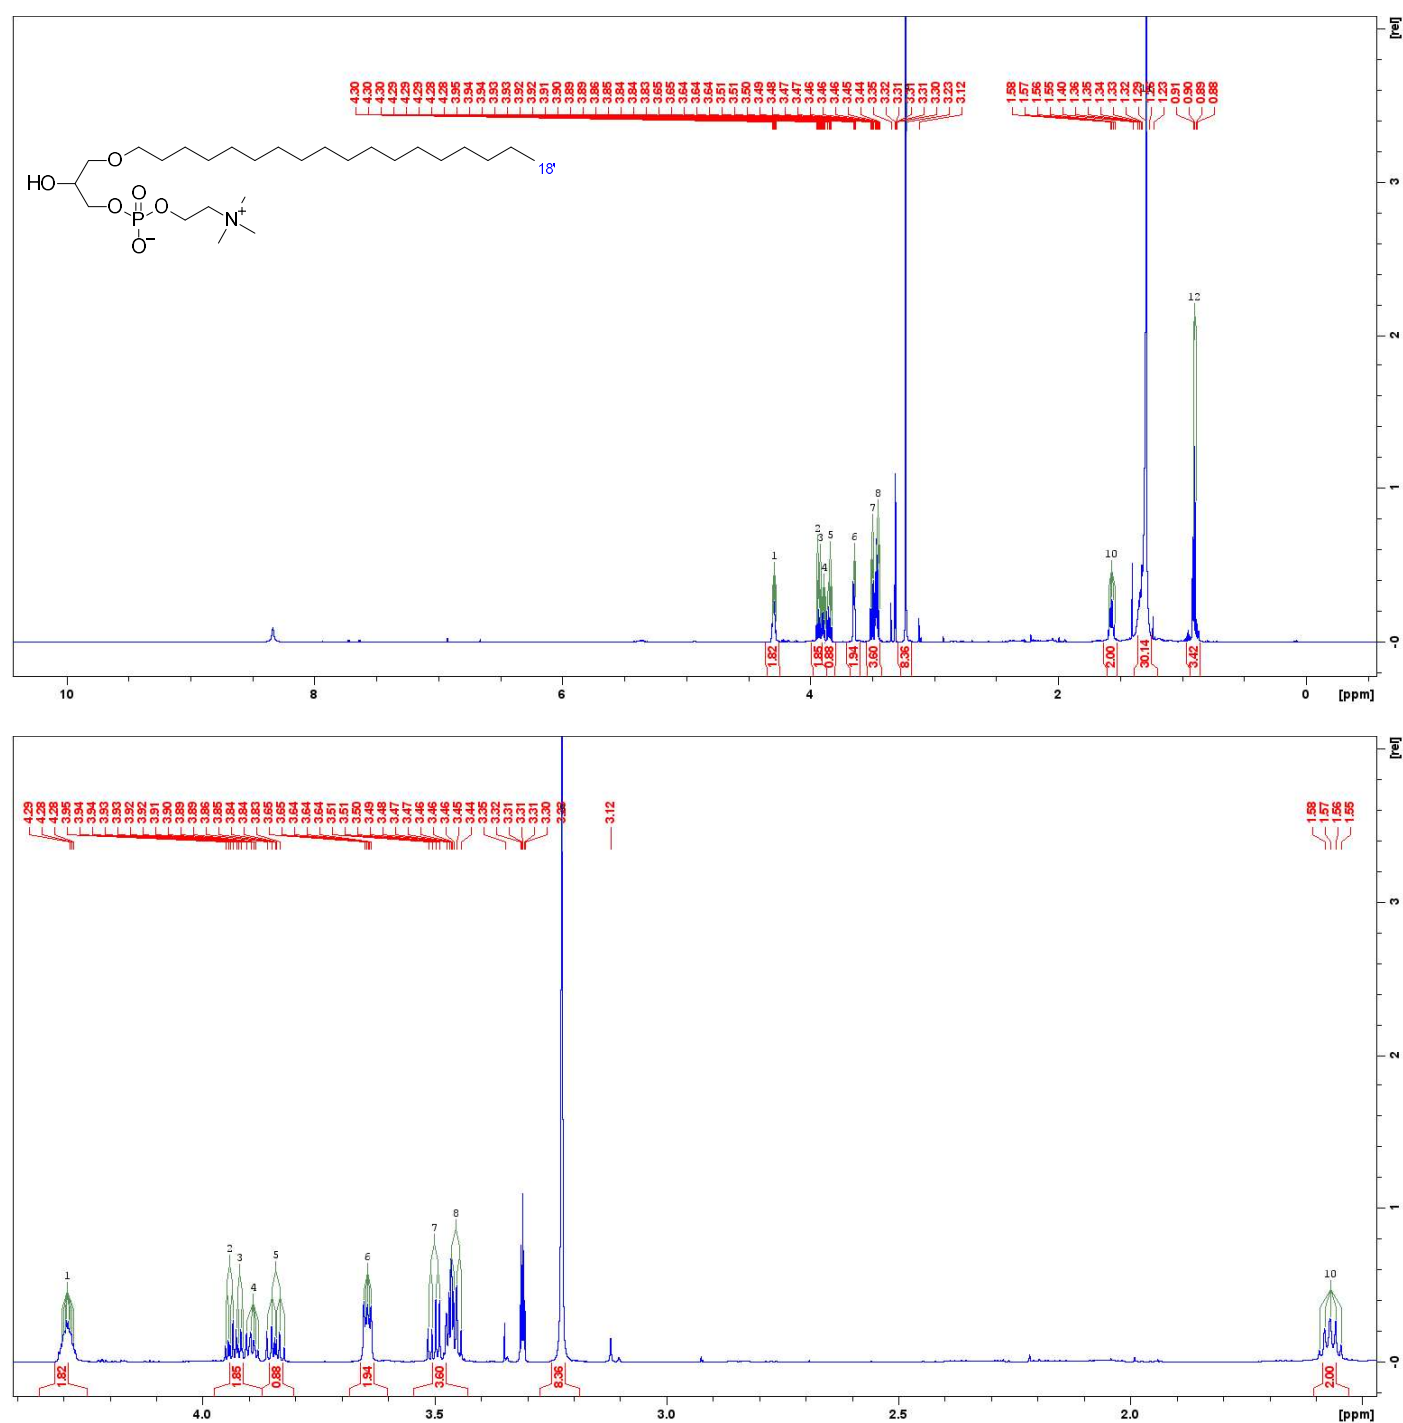

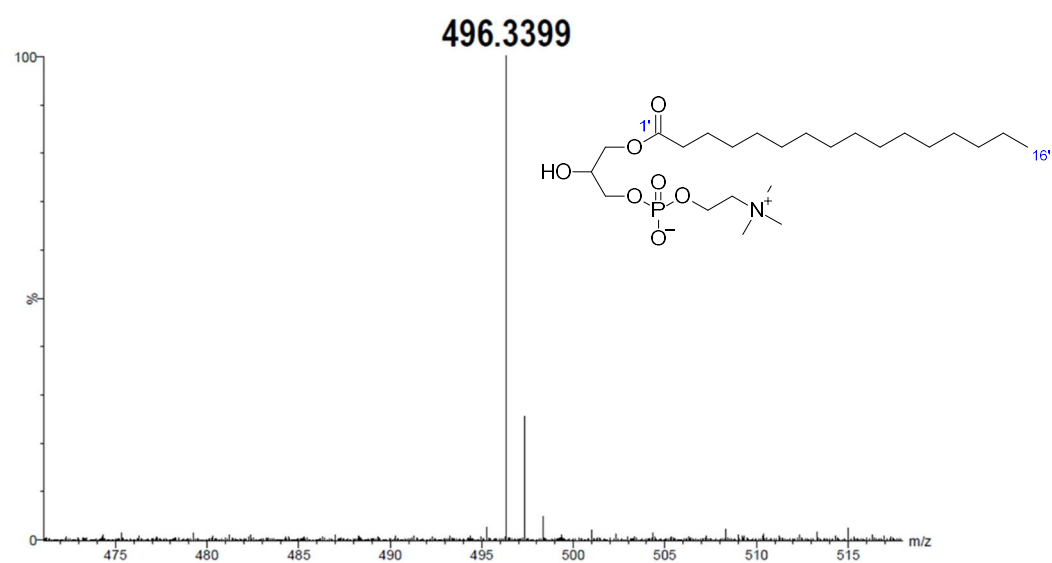

**Figure S23.** HRMS-ESI<sup>+</sup> spectrum of compound 1-palmitoyl-*sn*-glycero-3-phosphocholine (6).

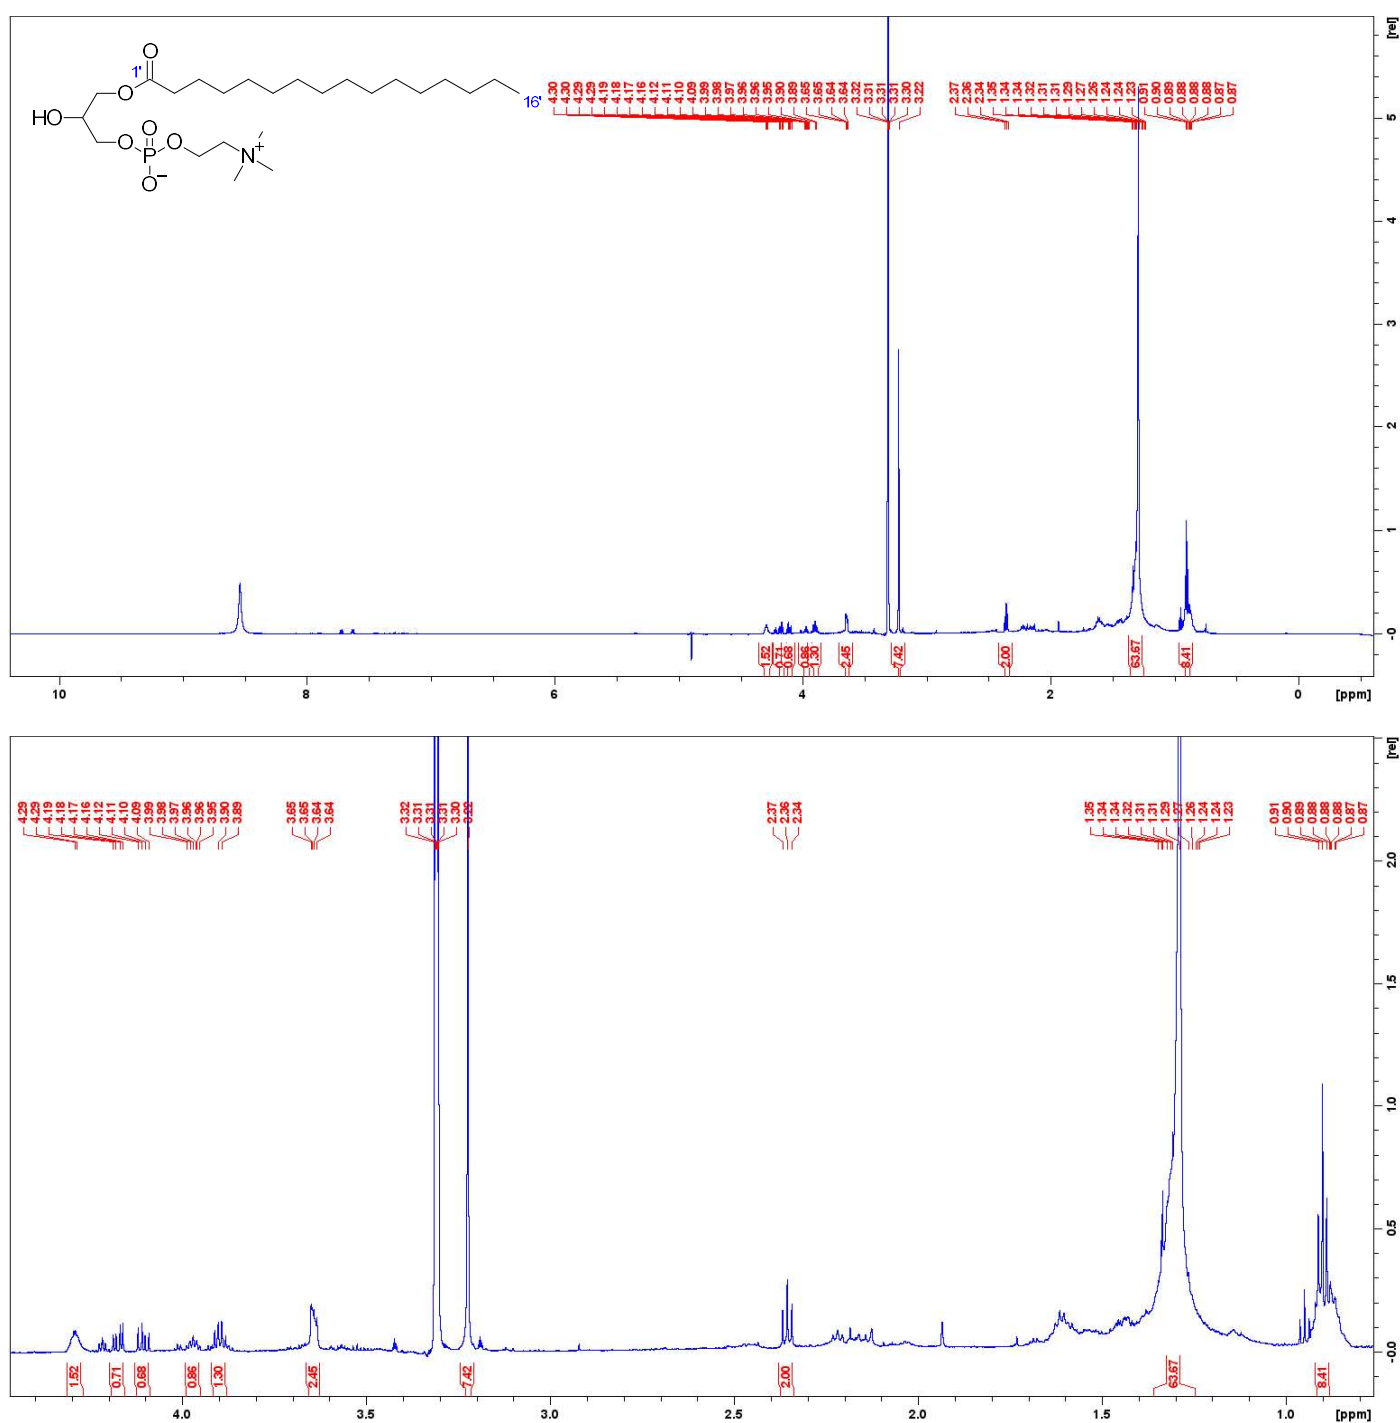

**Figure S24.**  $^1\text{H}$  NMR spectrum of compound 1-palmitoyl-*sn*-glycero-3-phosphocholine (6) (600 MHz, in  $\text{CD}_3\text{OD}$ ).



MAY13-165-NP3-F6-C3\_Mex3 1 (0.052) AM2 (Ar,18000.0,0.00,0.00); Cm (1:20)

1: TOF MS ES+  
4.82e6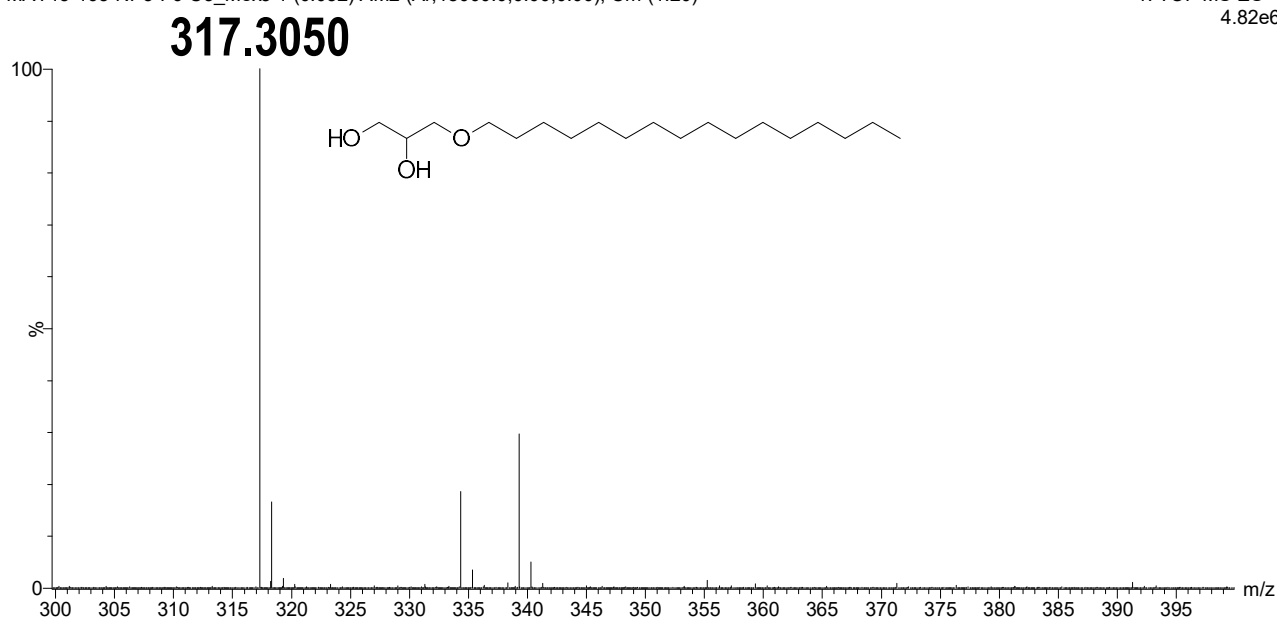**Figure S25.** HRMS-ESI<sup>+</sup> spectrum of compound 1-O-hexadecylglycerol (7).

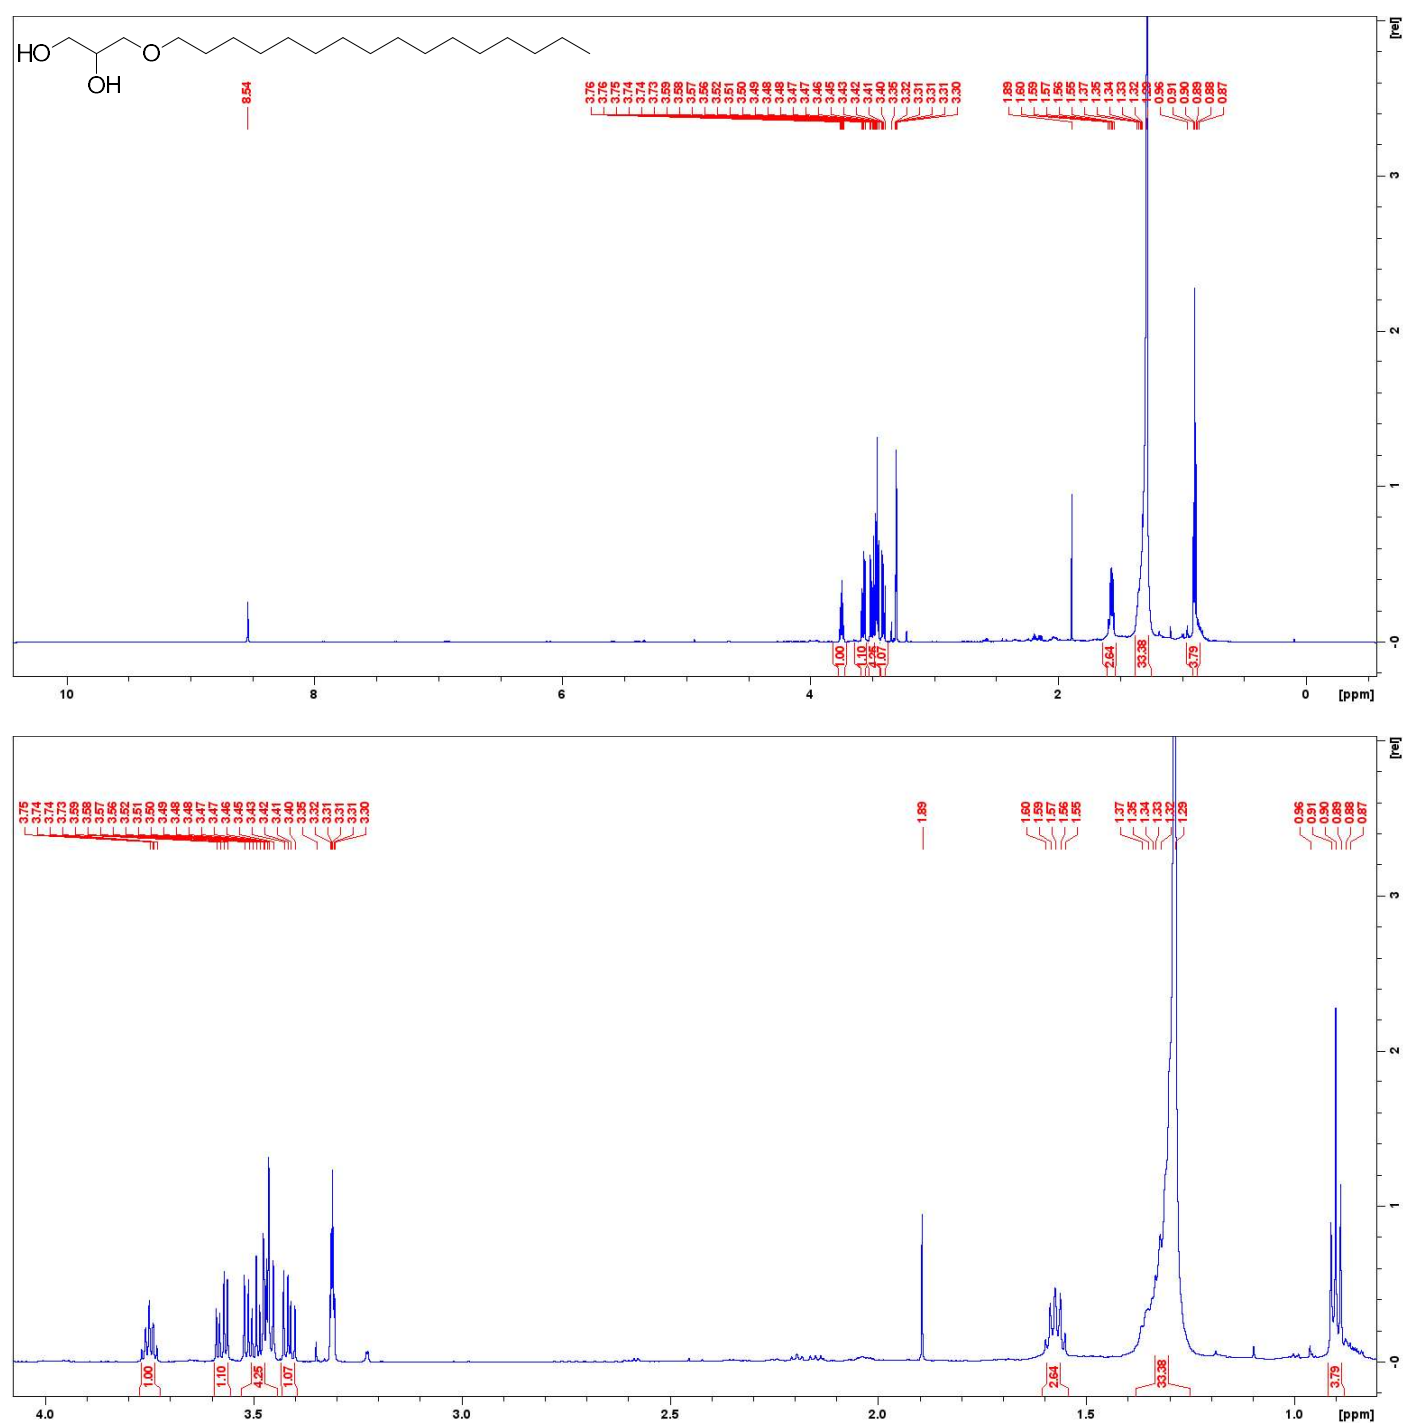

Figure S26.  $^1\text{H}$  NMR spectrum of compound 1-O-hexadecylglycerol (7) (600 MHz, in  $\text{CD}_3\text{OD}$ ).

MAY13-165-NP3-F6-C4\_Mex1 16 (0.406) AM2 (Ar,18000.0,0.00,0.00); Cm (1:20)

1: TOF MS ES+  
1.15e7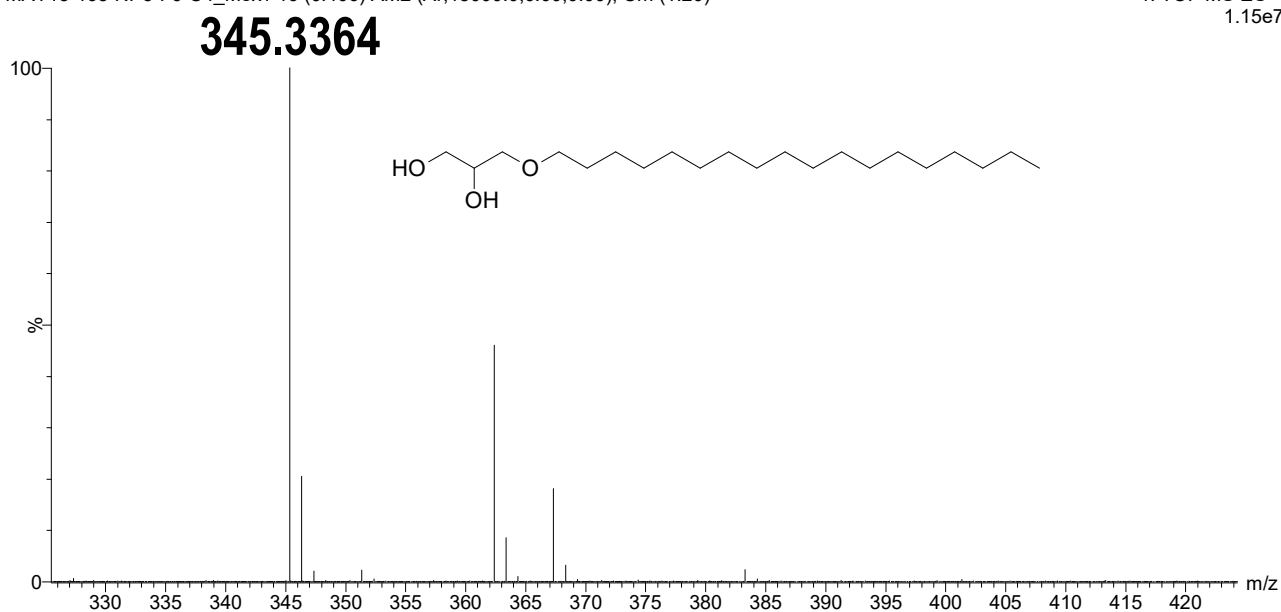**Figure S27.** HRMS-ESI<sup>+</sup> spectrum of compound 1-O-octadecylglycerol (8).

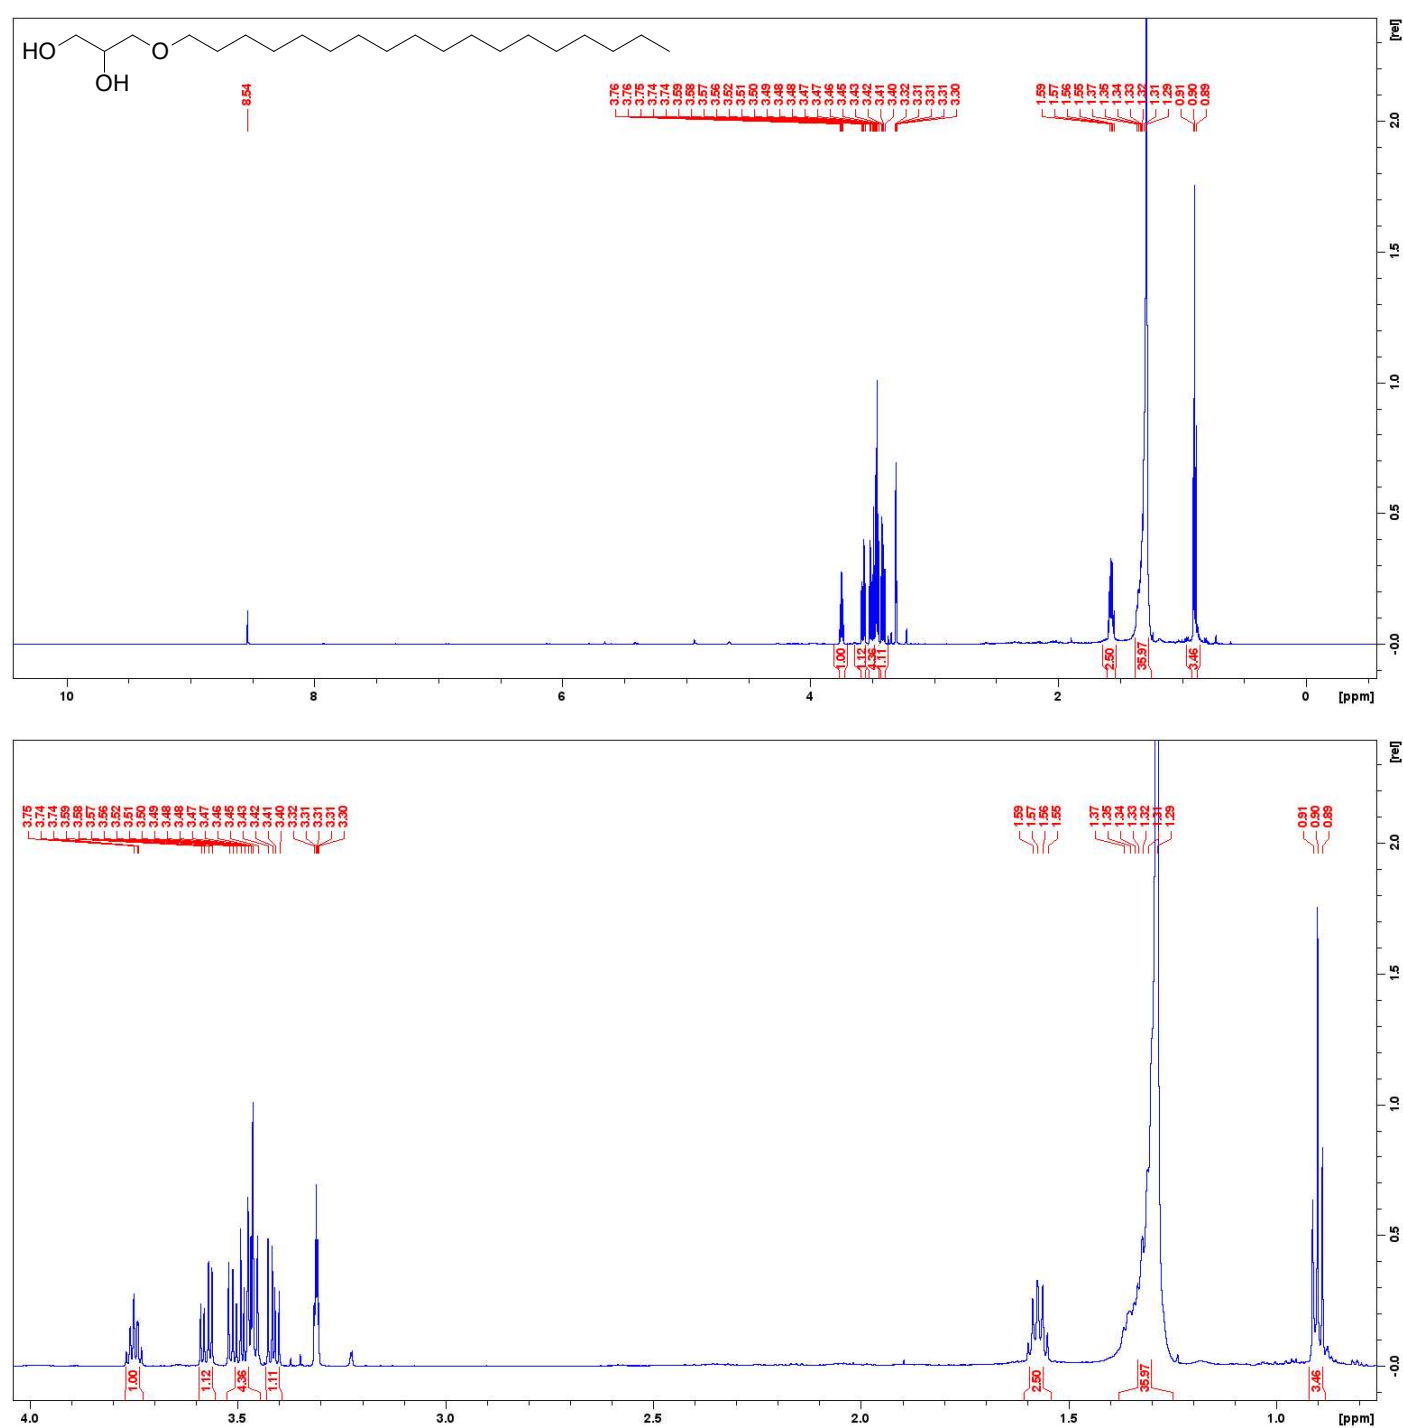

Figure S28. <sup>1</sup>H NMR spectrum of compound 1-O-octadecylglycerol (8) (600 MHz, in CD<sub>3</sub>OD).

NP3-F6-C5\_Mex1 12 (0.299) AM2 (Ar,18000.0,0.00,0.00); Cm (1:20)

1: TOF MS ES+  
1.26e6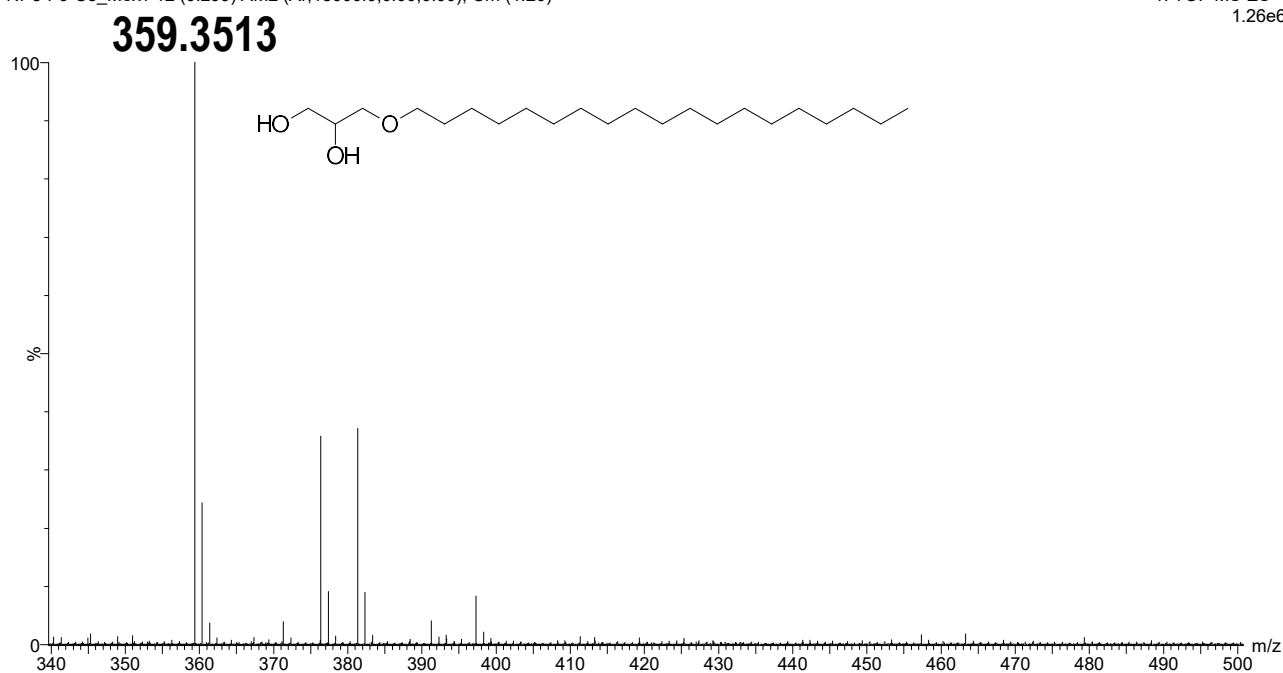

**Figure S29.** HRMS-ESI<sup>+</sup> spectrum of compound 3-nonadecyloxy-1,2-propanediol (9).

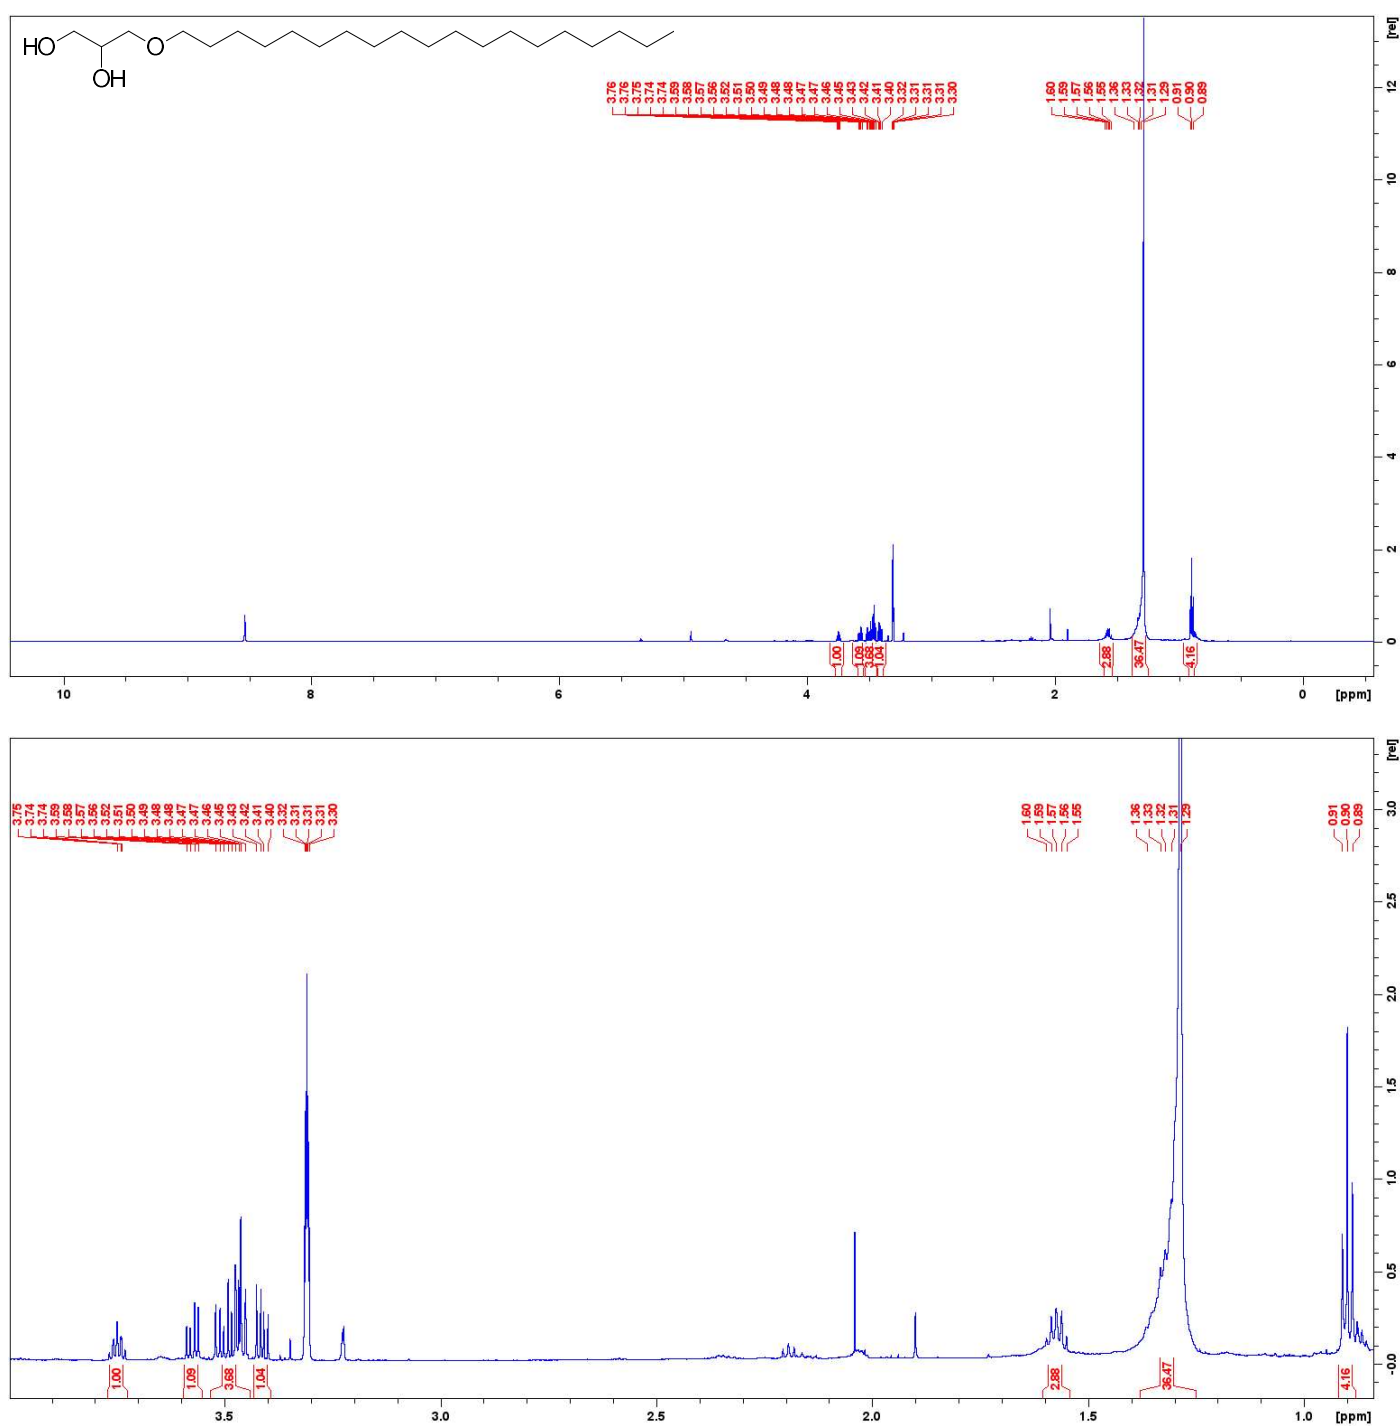

**Figure S30.**  $^1\text{H}$  NMR spectrum of compound 3-nonadecyloxy-1,2-propanediol (9) (600 MHz, in  $\text{CD}_3\text{OD}$ ).

MAY13-165-NP3-F6-C6\_Mex1 4 (0.123) AM2 (Ar,18000.0,0.00,0.00); Cm (1:20)

1: TOF MS ES+  
9.05e5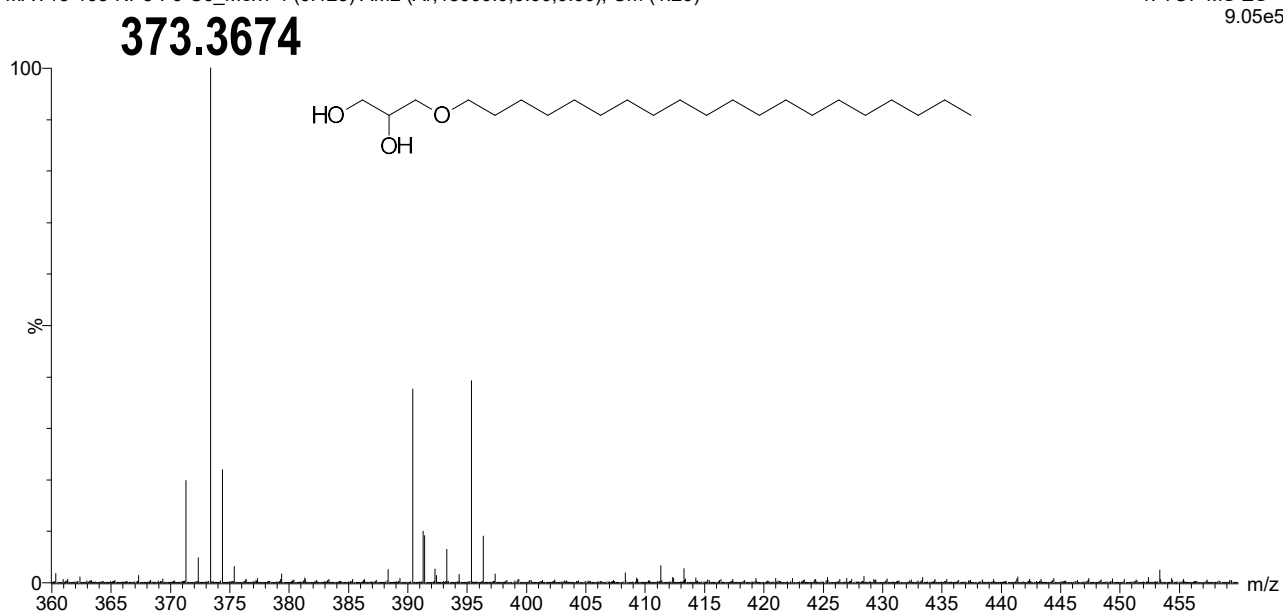**Figure S31.** HRMS-ESI<sup>+</sup> spectrum of compound 3-icosoxypropane-1,2-diol (**10**).

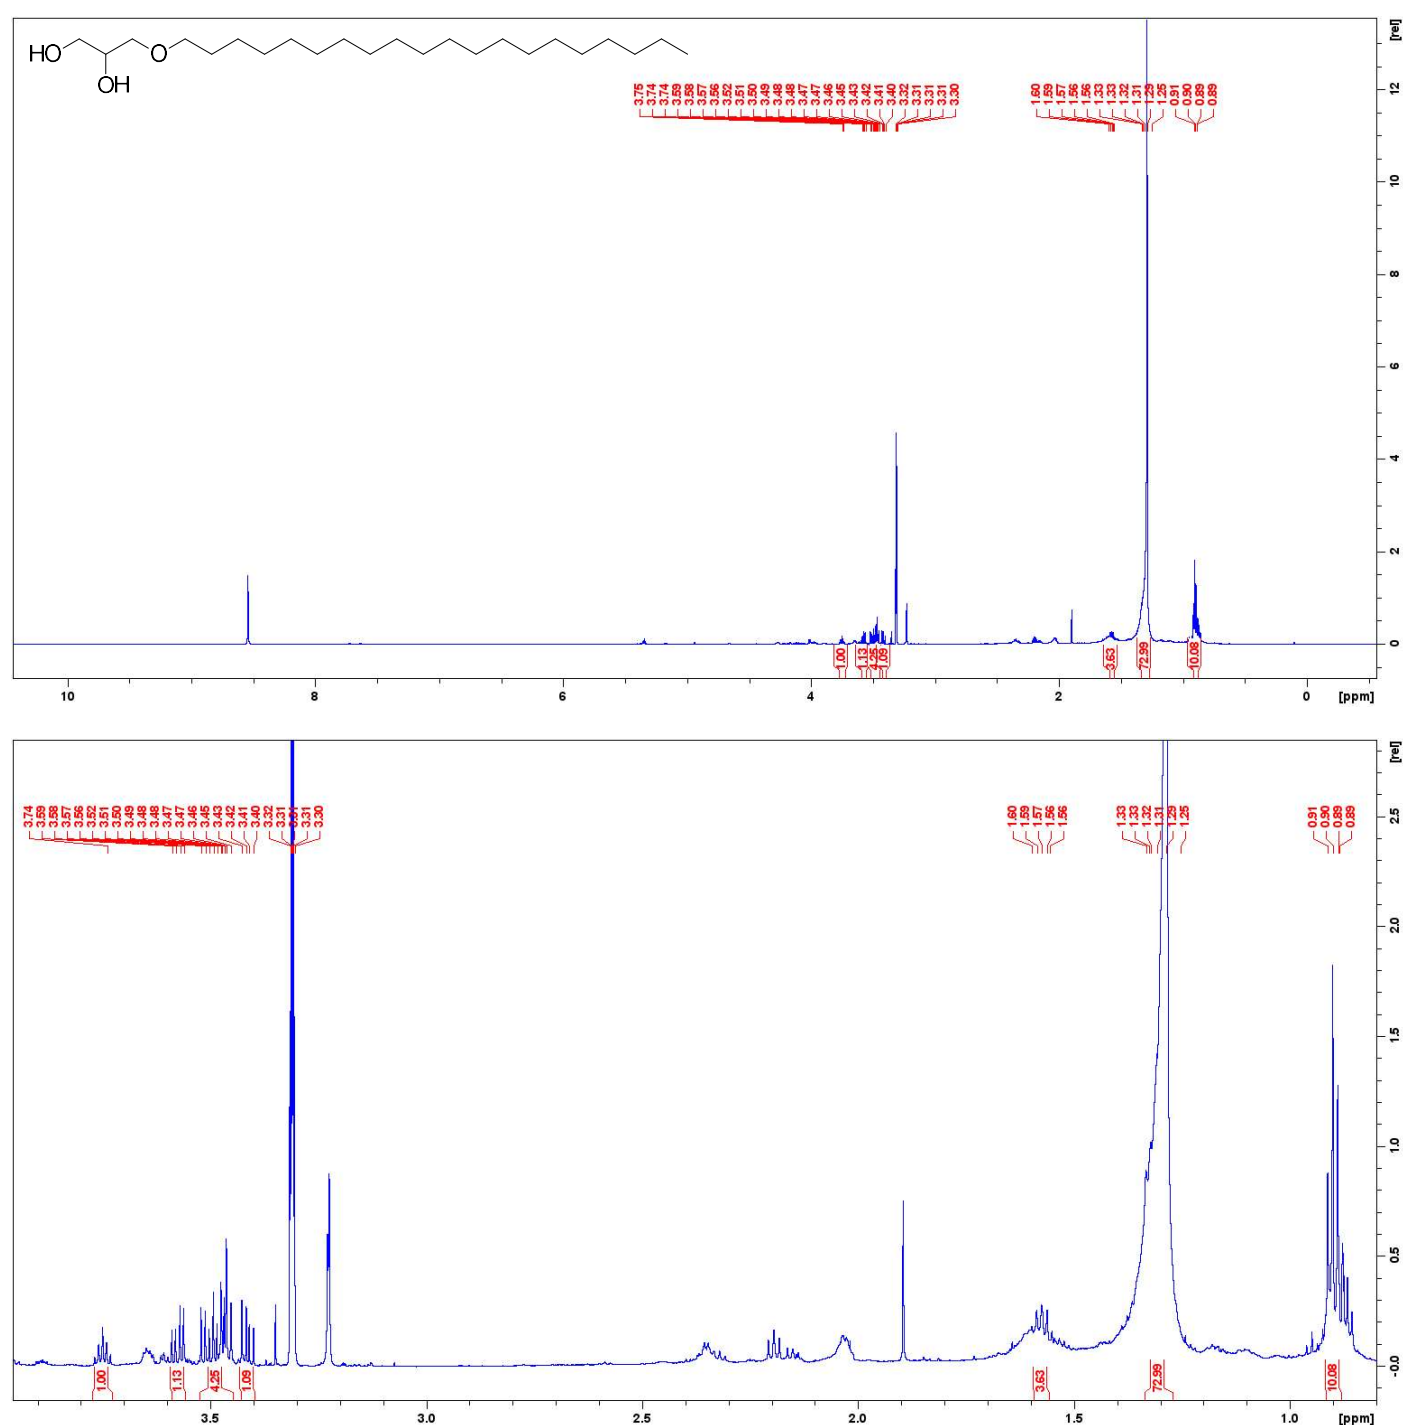

Figure S32.  $^1\text{H}$  NMR spectrum of compound 3-icosoxypropane-1,2-diol (10) (600 MHz, in  $\text{CD}_3\text{OD}$ ).



NP\_F4F5-F11F12-C2\_Mex3 3 (0.086) AM2 (Ar,18000.0,0.00,0.00); Cm (1:20)

1: TOF MS ES+  
5.03e5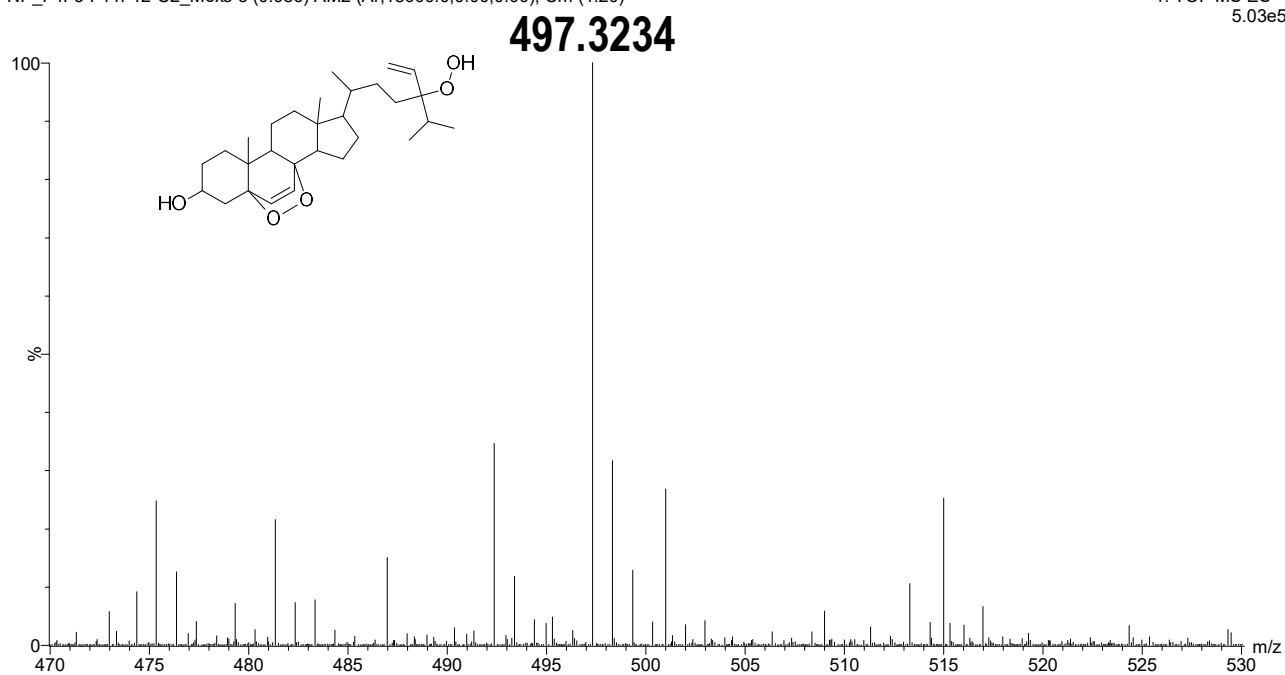

**Figure S33.** HRMS-ESI<sup>+</sup> spectrum of compound 5 $\alpha$ ,8 $\alpha$ -epidioxy-24(*R/S*)-hydroperoxystigmasta-6,28-dien-3 $\beta$ -ol (**11**).

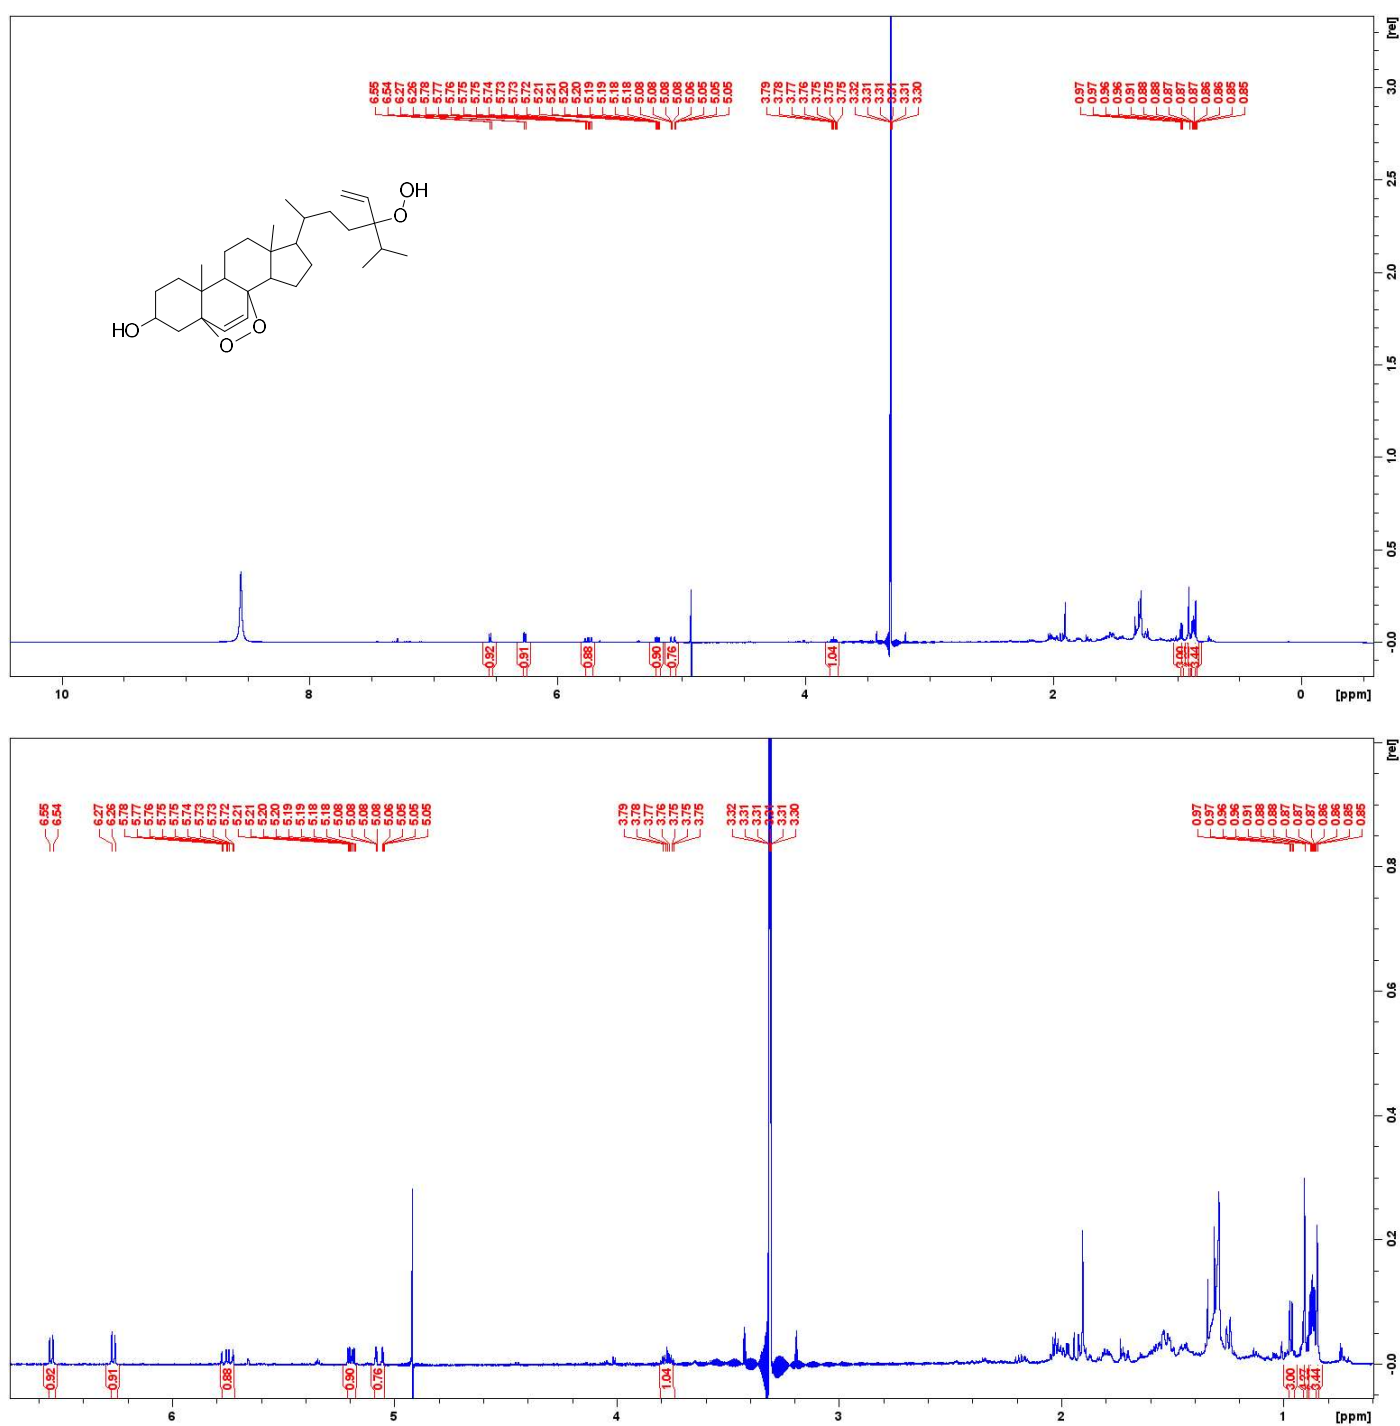

**Figure S34.**  $^1\text{H}$  NMR spectrum of compound 5 $\alpha$ ,8 $\alpha$ -epidioxy-24(R/S)-hydroperoxystigmasta-6,28-dien-3 $\beta$ -ol (11) (600 MHz, in  $\text{CD}_3\text{OD}$ ).

MAY13-165-RP-F16-C64\_Mex1 11 (0.282) AM2 (Ar,18000.0,0.00,0.00); Cm (1:20)

1: TOF MS ES+  
6.23e5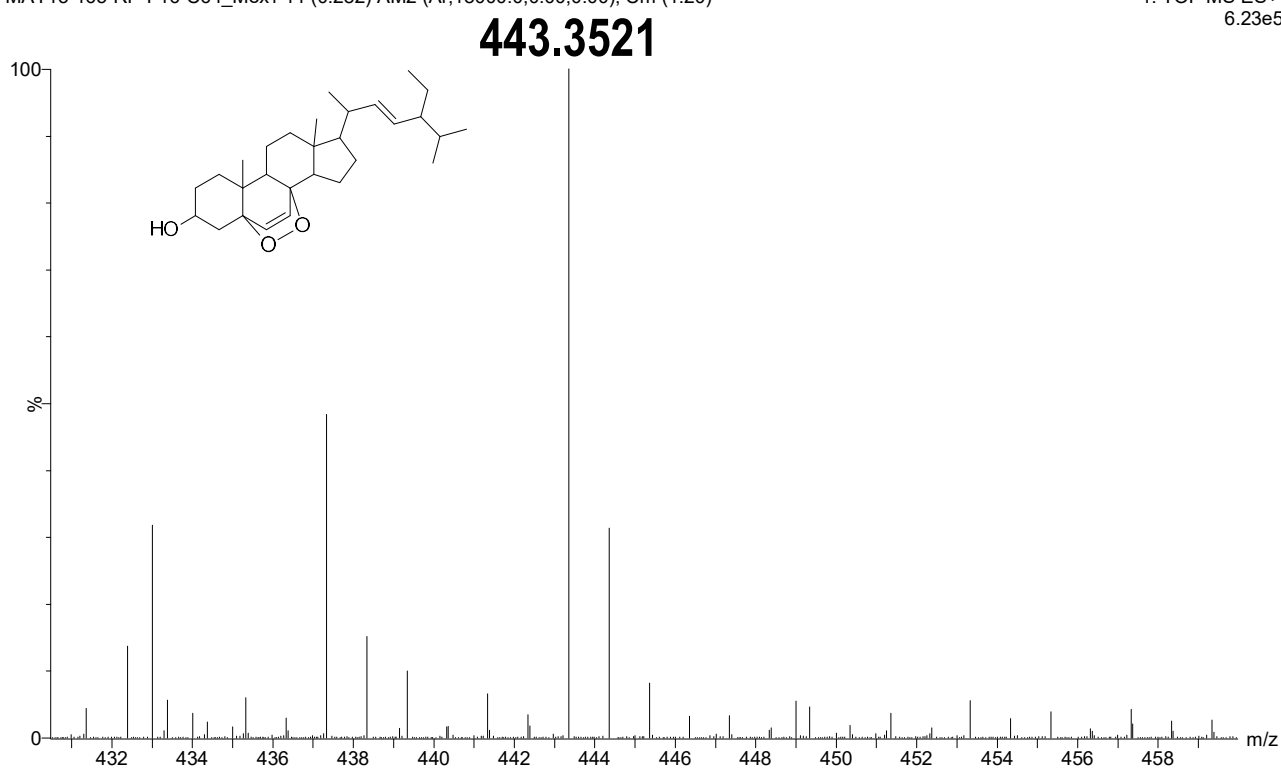

**Figure S35.** HRMS-ESI<sup>+</sup> spectrum of compound 5α,8α-epidioxy-24(R/S)-stigmasta-6,22E-dien-3β-ol (**12**).

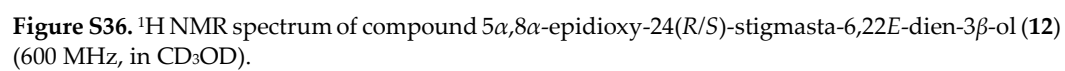

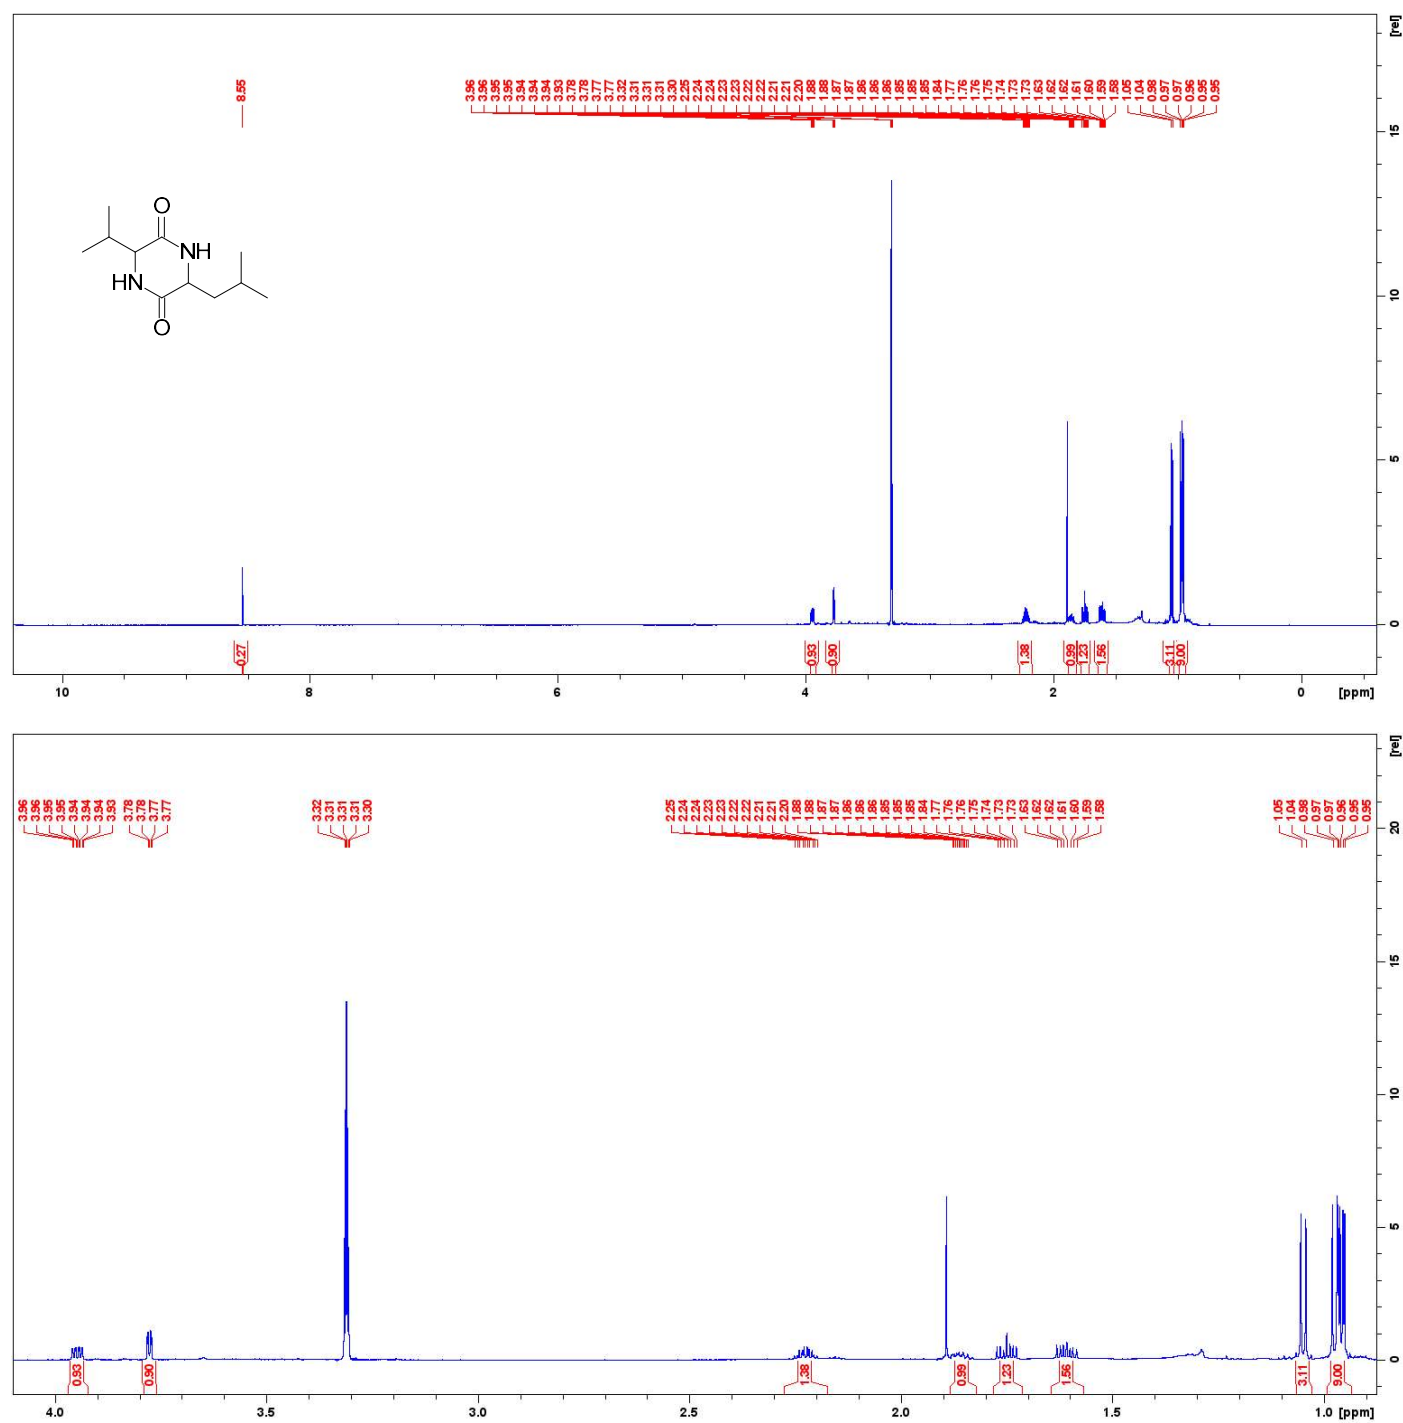

Figure S37.  $^1\text{H}$  NMR spectrum of compound cyclo(Val-Leu) (13) (600 MHz, in  $\text{CD}_3\text{OD}$ ).

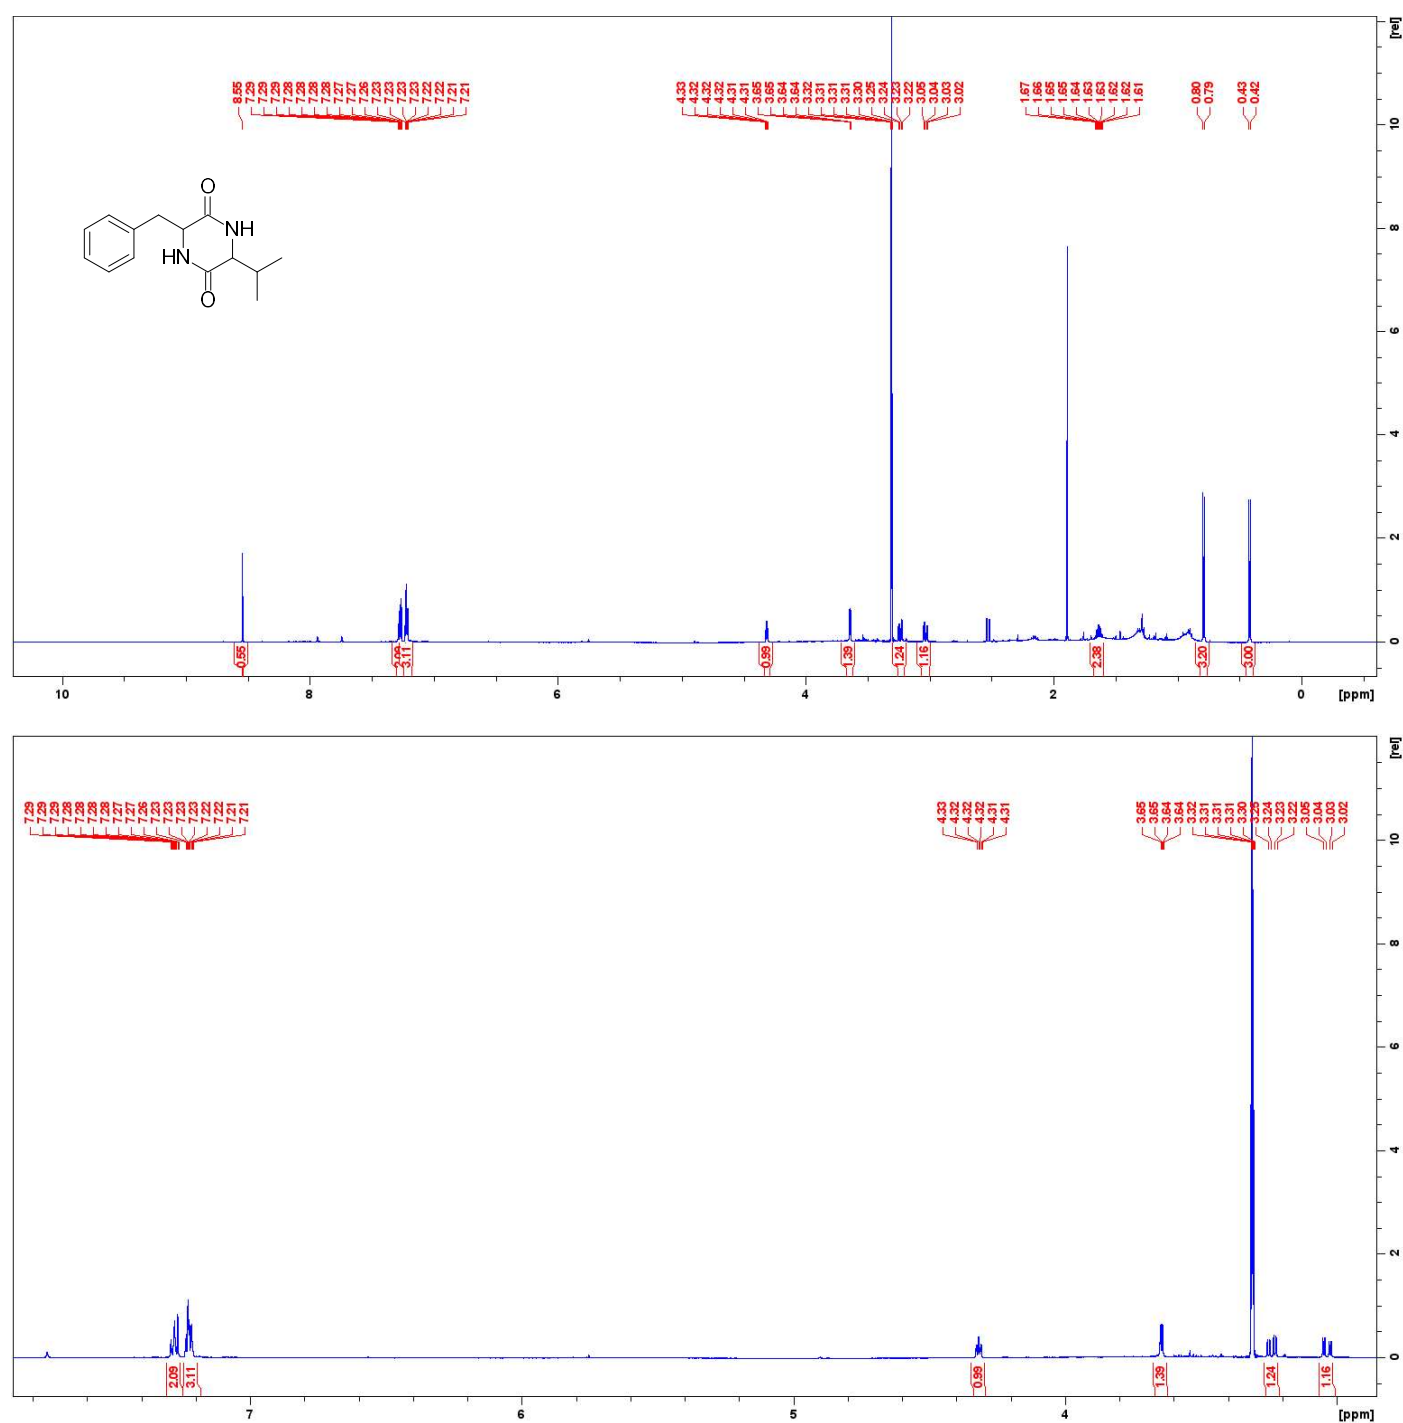

Figure S38.  $^1\text{H}$  NMR spectrum of compound cyclo(Val-Phe) (**14**) (600 MHz, in  $\text{CD}_3\text{OD}$ ).

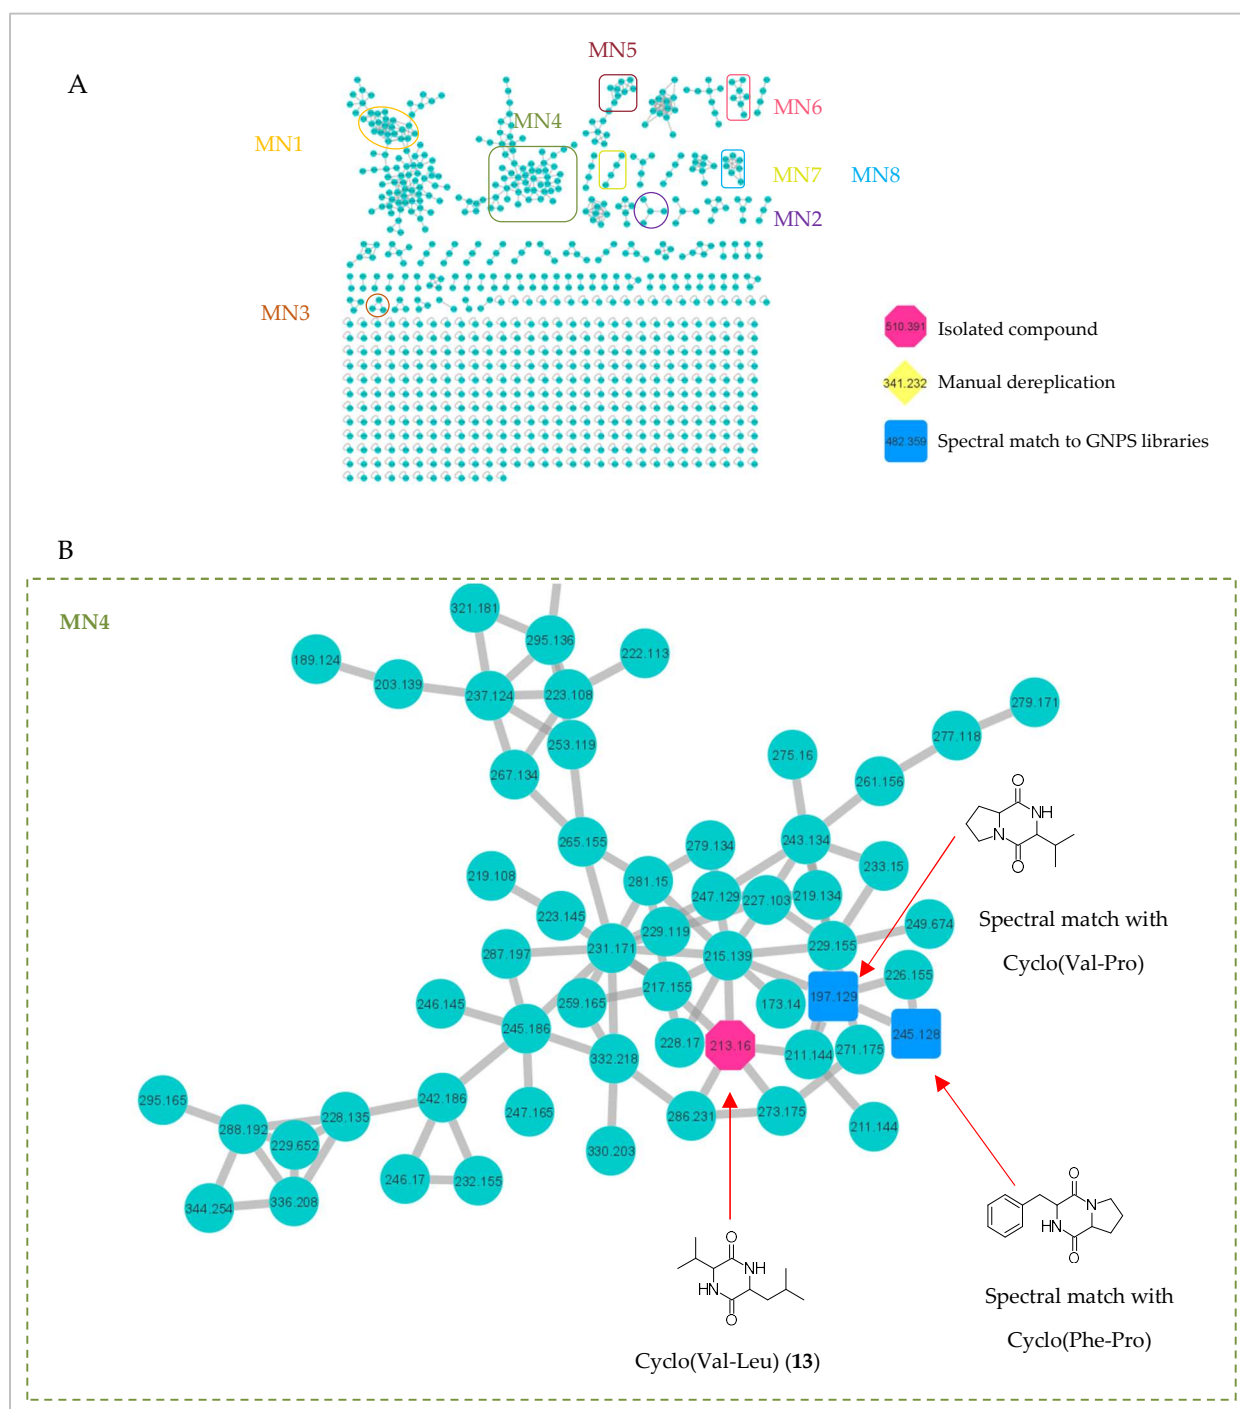

**Figure S39.** Dereplication of *Scopalina hapalia* fractions using LC-MS/MS molecular networking. (A) Molecular Network constructed using MS/MS data from fractions of *Scopalina hapalia*, obtained after the removal of non-polar lipids of organic crude extract, with a cosine similarity cutoff of 0.7. Edge thickness corresponds to relative cosine score similarity between nodes. Annotated clusters are enlarged. (B) Cluster MN4 related to diketopiperazines.

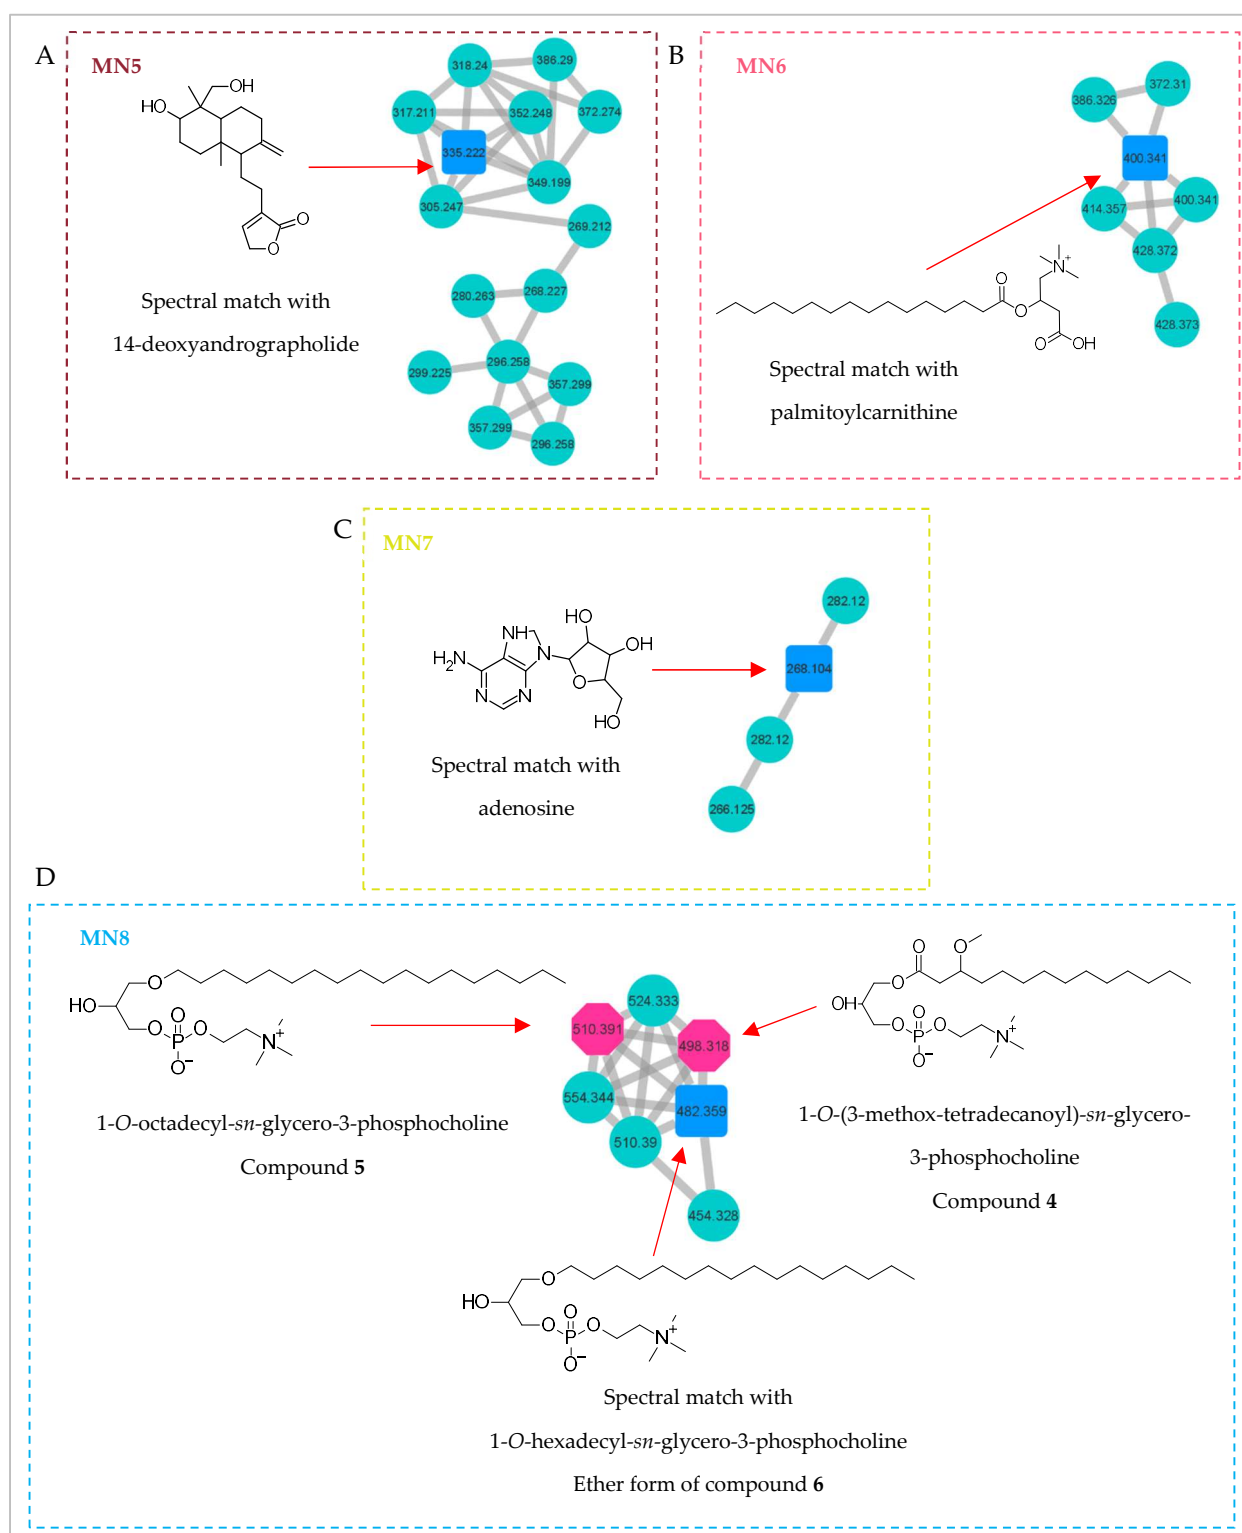

**Figure S40.** Dereplication of *Scopalina hapalia* fractions using LC-MS/MS molecular networking. (A) Cluster MN5 related to terpenoids. (B) Cluster MN6 related to palmitoylcarnithine. (C) Cluster MN7 related to purine nucleosides. (D) Cluster MN8 related to lysophospholipids.
